# Supplementary material for: Relative vaccine effectiveness against Delta and Omicron COVID-19 after homologous inactivated vaccine boosting: a retrospective cohort study
Source: PubMed Central journal article supplement — BMJ Open. 2022 Nov 11;12(11):e063919. doi: 10.1136/bmjopen-2022-063919 (PMC9659710; doi:10.1136/bmjopen-2022-063919), 2022-11-11
Supplement: bmjopen-2022-063919.draft_revisions.pdf [file bmjopen-2022-063919.draft_revisions.pdf]

# BMJ Open

BMJ Open is committed to open peer review. As part of this commitment we make the peer review history of every article we publish publicly available.

When an article is published we post the peer reviewers' comments and the authors' responses online. We also post the versions of the paper that were used during peer review. These are the versions that the peer review comments apply to.

The versions of the paper that follow are the versions that were submitted during the peer review process. They are not the versions of record or the final published versions. They should not be cited or distributed as the published version of this manuscript.

BMJ Open is an open access journal and the full, final, typeset and author-corrected version of record of the manuscript is available on our site with no access controls, subscription charges or pay-per-view fees (<http://bmjopen.bmj.com>).

If you have any questions on BMJ Open's open peer review process please email [info.bmjopen@bmj.com](mailto:info.bmjopen@bmj.com)

# BMJ Open

## Relative vaccine effectiveness against Delta and Omicron COVID-19 after homologous inactivated vaccine boosting: a retrospective cohort study

|                               |                                                                                                                                                                                                                                                                                                                                                                                                                                                                                                                                                                                                                                                                                                                                                                                                                                                                                                                                                                                                                                                                                                                                                                                                                                                                                                                                                                                                                                                                                                                                                                                                                                                                                                                                                                                                                                                                                                                                                                                                                                                                                                                                                                                                                                                                       |
|-------------------------------|-----------------------------------------------------------------------------------------------------------------------------------------------------------------------------------------------------------------------------------------------------------------------------------------------------------------------------------------------------------------------------------------------------------------------------------------------------------------------------------------------------------------------------------------------------------------------------------------------------------------------------------------------------------------------------------------------------------------------------------------------------------------------------------------------------------------------------------------------------------------------------------------------------------------------------------------------------------------------------------------------------------------------------------------------------------------------------------------------------------------------------------------------------------------------------------------------------------------------------------------------------------------------------------------------------------------------------------------------------------------------------------------------------------------------------------------------------------------------------------------------------------------------------------------------------------------------------------------------------------------------------------------------------------------------------------------------------------------------------------------------------------------------------------------------------------------------------------------------------------------------------------------------------------------------------------------------------------------------------------------------------------------------------------------------------------------------------------------------------------------------------------------------------------------------------------------------------------------------------------------------------------------------|
| Journal:                      | <i>BMJ Open</i>                                                                                                                                                                                                                                                                                                                                                                                                                                                                                                                                                                                                                                                                                                                                                                                                                                                                                                                                                                                                                                                                                                                                                                                                                                                                                                                                                                                                                                                                                                                                                                                                                                                                                                                                                                                                                                                                                                                                                                                                                                                                                                                                                                                                                                                       |
| Manuscript ID                 | bmjopen-2022-063919                                                                                                                                                                                                                                                                                                                                                                                                                                                                                                                                                                                                                                                                                                                                                                                                                                                                                                                                                                                                                                                                                                                                                                                                                                                                                                                                                                                                                                                                                                                                                                                                                                                                                                                                                                                                                                                                                                                                                                                                                                                                                                                                                                                                                                                   |
| Article Type:                 | Original research                                                                                                                                                                                                                                                                                                                                                                                                                                                                                                                                                                                                                                                                                                                                                                                                                                                                                                                                                                                                                                                                                                                                                                                                                                                                                                                                                                                                                                                                                                                                                                                                                                                                                                                                                                                                                                                                                                                                                                                                                                                                                                                                                                                                                                                     |
| Date Submitted by the Author: | 19-Apr-2022                                                                                                                                                                                                                                                                                                                                                                                                                                                                                                                                                                                                                                                                                                                                                                                                                                                                                                                                                                                                                                                                                                                                                                                                                                                                                                                                                                                                                                                                                                                                                                                                                                                                                                                                                                                                                                                                                                                                                                                                                                                                                                                                                                                                                                                           |
| Complete List of Authors:     | <p>Tang, Lin; Chinese Center for Disease Control and Prevention, National Immunization Program</p> <p>Zhang, Yanyang; Henan Provincial Center for Disease Control and Prevention</p> <p>Wang, Fuzhen; Chinese Center for Disease Control and Prevention</p> <p>Wu, Dan; Chinese Center for Disease Control and Prevention</p> <p>Qian, Zhao-Hui; NHC Key laboratory of Systems Biology of Pathogens, Institute of Pathogen Biology, Chinese Academy of Medical Sciences and Peking Union Medical College, Beijing, China</p> <p>Zhang, Rui; National Center for Clinical Laboratories, Beijing Hospital, National Center of Gerontology; Institute of Geriatric Medicine, Chinese Academy of Medical Sciences</p> <p>Wang, Ai-Bin; Beijing Ditan Hospital Capital Medical University</p> <p>Huang, Chang; Chinese Center for Disease Control and Prevention; China Field Epidemiology Training Program</p> <p>Wang, Haifeng; Henan Provincial Center for Disease Control and Prevention</p> <p>Ye, Ying; Henan Provincial Center for Disease Control and Prevention</p> <p>Lu, Mingxia; Henan Provincial Center for Disease Control and Prevention</p> <p>Wang, Changshuang; Henan Provincial Center for Disease Control and Prevention</p> <p>Ma, Ya-ting; Henan Province Center for Disease Control and Prevention</p> <p>Pan, Jingjing; Henan Province Center for Disease Control and Prevention</p> <p>Li, Ya-fei; Henan Province Center for Disease Control and Prevention</p> <p>Lv, Xiao-Ya; Development Center for Medicine and Science &amp;Technology, National Health Commission</p> <p>An, Zhijie; Chinese Center for Disease Control and Prevention, National Immunization Program</p> <p>Rodewald, Lance; Chinese Center for Disease Control and Prevention, National Immunization Program</p> <p>Wang, Xuan-Yi; Fudan University</p> <p>Shao, Yi-Ming; State Key Laboratory of Infectious Disease Prevention and Control, National Center for AIDS/STD Control and Prevention, Chinese Center for Disease Control and Prevention</p> <p>Wu, Zhi-Yin; Development Center for Medicine and Science &amp;Technology, National Health Commission</p> <p>Yin, Zundong; Chinese Center for Disease Control and Prevention, National Immunization Program</p> |

1  
2  
3  
4  
5  
6  
7  
8  
9  
10  
11  
12  
13  
14  
15  
16  
17  
18  
19  
20  
21  
22  
23  
24  
25  
26  
27  
28  
29  
30  
31  
32  
33  
34  
35  
36  
37  
38  
39  
40  
41  
42  
43  
44  
45  
46  
47  
48  
49  
50  
51  
52  
53  
54  
55  
56  
57  
58  
59  
60

|           |                                                                                                                                          |
|-----------|------------------------------------------------------------------------------------------------------------------------------------------|
| Keywords: | COVID-19, Infectious diseases & infestations < DERMATOLOGY, Epidemiology < INFECTIOUS DISEASES, Immunology < NATURAL SCIENCE DISCIPLINES |
|           |                                                                                                                                          |

SCHOLARONE™  
Manuscripts

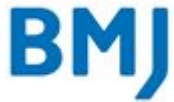

I, the Submitting Author has the right to grant and does grant on behalf of all authors of the Work (as defined in the below author licence), an exclusive licence and/or a non-exclusive licence for contributions from authors who are: i) UK Crown employees; ii) where BMJ has agreed a CC-BY licence shall apply, and/or iii) in accordance with the terms applicable for US Federal Government officers or employees acting as part of their official duties; on a worldwide, perpetual, irrevocable, royalty-free basis to BMJ Publishing Group Ltd ("BMJ") its licensees and where the relevant Journal is co-owned by BMJ to the co-owners of the Journal, to publish the Work in this journal and any other BMJ products and to exploit all rights, as set out in our [licence](#).

The Submitting Author accepts and understands that any supply made under these terms is made by BMJ to the Submitting Author unless you are acting as an employee on behalf of your employer or a postgraduate student of an affiliated institution which is paying any applicable article publishing charge ("APC") for Open Access articles. Where the Submitting Author wishes to make the Work available on an Open Access basis (and intends to pay the relevant APC), the terms of reuse of such Open Access shall be governed by a Creative Commons licence – details of these licences and which [Creative Commons](#) licence will apply to this Work are set out in our licence referred to above.

Other than as permitted in any relevant BMJ Author's Self Archiving Policies, I confirm this Work has not been accepted for publication elsewhere, is not being considered for publication elsewhere and does not duplicate material already published. I confirm all authors consent to publication of this Work and authorise the granting of this licence.

1  
2  
3  
4  
5  
6  
7  
8  
9  
10  
11  
12  
13  
14  
15  
16  
17  
18  
19  
20  
21  
22  
23  
24  
25  
26  
27  
28  
29  
30  
31  
32  
33  
34  
35  
36  
37  
38  
39  
40  
41  
42  
43  
44  
45  
46  
47  
48  
49  
50  
51  
52  
53  
54  
55  
56  
57  
58  
59  
60

## Relative vaccine effectiveness against Delta and Omicron COVID-19 after homologous inactivated vaccine boosting: a retrospective cohort study

Lin Tang<sup>1\*</sup>, Yan-Yang Zhang<sup>2\*</sup>, Fu-Zhen Wang<sup>1</sup>, Dan Wu<sup>1</sup>, Zhao-Hui Qian<sup>3</sup>, Rui Zhang<sup>4</sup>, Ai-Bin Wang<sup>5</sup>, Chang Huang<sup>1,6</sup>, Hai-feng Wang<sup>2</sup>, Ying Ye<sup>2</sup>, Ming-Xia Lu<sup>2</sup>, Chang-Shuang Wang<sup>2</sup>, Ya-ting Ma<sup>2</sup>, Jingjing Pan<sup>2</sup>, Ya-fei Li<sup>2</sup>, Xiao-Ya Lv<sup>7</sup>, Zhi-Jie An<sup>1</sup>, Lance E. Rodewald<sup>1</sup>, Xuan-Yi Wang<sup>8&</sup>, Yi-Ming Shao<sup>9&</sup>, Zhi-Yin Wu<sup>7&</sup>, Zun-Dong Yin<sup>1&</sup>

\*Join first authors.

Lin Tang and Yan-yang Zhang contributed equally to this work.

&Joint corresponding authors

Correspondence to: yinzd@chinacdc.cn    yshao@chinaaids.cn  
zhiyinwu@126.com    xywang@shmu.edu.cn

1. National Immunization Program, Chinese Center for Disease Control and Prevention, Beijing, China
2. Henan Provincial Disease Control and Prevention, China
3. NHC Key laboratory of Systems Biology of Pathogens, Institute of Pathogen Biology, Chinese Academy of Medical Sciences and Peking Union Medical College, Beijing, China
4. National Center for Clinical Laboratories, Beijing Hospital, National Center of Gerontology; Institute of Geriatric Medicine, Chinese Academy of Medical Sciences, China
5. Beijing Ditan Hospital Capital Medical University
6. China Field Epidemiology Training Program
7. Development Center for Medicine and Science & Technology, National Health Commission, China
8. Shanghai Institute of Infectious Disease and Biosecurity, Key Laboratory of Medical Molecular Virology of MoE & MoH, and Institutes of Biomedical Sciences, Shanghai Medical College, Fudan University, China
9. State Key Laboratory of Infectious Disease Prevention and Control, National Center for AIDS/STD Control and Prevention, Chinese Center for Disease Control and Prevention Beijing, China

## ABSTRACT

### Objective

Two COVID-19 outbreaks occurred in Henan province in early 2022 – one was a Delta variant outbreak and the other was an Omicron outbreak. COVID-19 vaccines used at the time of the outbreak were inactivated, 91.8%; protein subunit, 7.5%; and adenovirus5-vectored, 0.7%. The outbreaks provided an opportunity to evaluate the performance of COVID-19 vaccines used in China, including homologous boosting of inactivated COVID-19 vaccines.

### Design: A retrospective cohort study

### Methods

We evaluated relative vaccine effectiveness (rVE) with a retrospective cohort study of close contacts of infected individuals using a time-dependent Cox regression model. Demographic and epidemiologic data were obtained from the local Center for Disease Control and Prevention; clinical and laboratory data were obtained from COVID-19-designated hospitals. Vaccination histories were obtained from the national COVID-19 vaccination dataset. All data were linked by national identification number.

### Results

Among 784 SARS-CoV-2 infections, 379 (48.3%) were caused by Delta and 405 (51.7%) were caused by Omicron, representing breakthrough rates of 9.9% and 17.8%, respectively. Breakthrough rates among boosted individuals were 8.1% and 4.9%. Compared with subjects who received primary vaccination series  $\geq$  180 days before infection, Cox regression modeling showed that homologous inactivated booster vaccination was statistically significantly associated with protection from symptomatic infection caused by Omicron (rVE 59%; 95% CI: 14%-80%) and pneumonia caused by Delta (rVE 62%; 95%CI: 34%-77%) and Omicron (rVE 87%; 95%CI: 3%-98%).

### Conclusions

Protection from Delta and Omicron COVID-19 declined over time, notably 6 months after primary vaccination. A homologous inactivated booster dose restored protection against both variants.

### What is already known on this topic

Previous research reported that vaccine effectiveness of currently approved vaccines against Delta and Omicron COVID-19. Real-world evidence shows that all approved COVID-19 vaccines have various degrees of waning vaccine effectiveness (VE) over time and demonstrate different protection against Delta and Omicron variants, but with VE against serious illness maintained significantly better than protection against SARS-CoV-2 infection and symptomatic COVID-19, and receipt of booster doses can restore waning protection, including against Delta and Omicron. There are fewer studies of China-produced COVID-19 vaccines than of WHO-approved vaccines produced in other countries. Several studies conducted in Guangdong, Jiangsu, and Henan provinces of China found that among adults aged 18–59 years old, vaccine effectiveness (VE) against Delta COVID-19 was 50%-60%, and effectiveness against severe illness was 80%-100%. Some real-world study results showed the vaccine effectiveness by COVID-19 vaccine declined to lower to prevent Pneumonia after 6 months. A study in Hong Kong showed better 2-dose protection against serious illness with mRNA vaccine than an inactivated vaccine, but equivalent 98% protection with a homologous booster dose.

### What this study adds

Our study used a Delta and Omicron outbreak in China's infection-naïve population to evaluate population-level protection from COVID-19 pneumonia that was built by a provincial immunization program with China-produced vaccines that were used as recommended by China's National Health Commission. In a retrospective cohort study, we found that homologous inactivated booster vaccination induced protection against Delta and Omicron pneumonia was 62% and 87% compared with vaccination  $\geq$  6 months prior to exposure to SARS-CoV-2. There were too few cases of Omicron pneumonia in boosted subjects to evaluate relative effectiveness against pneumonia.

### How this study might affect research, practice, or policy

Population immunity built with China-produced vaccines in an infection-naïve population effectively prevented progression to pneumonia caused by Delta and Omicron variants. Booster doses 6 months after primary vaccination are essential for building the strongest population immunity. All age-eligible people should be vaccinated, and schedule-eligible people should receive timely booster doses.

## INTRODUCTION

Most countries have experienced epidemic waves of COVID-19 caused by SARS-CoV-2 variants. As of December 11, 2021, five SARS-CoV-2 Variants of Concern (VOCs) have been identified, with Alpha (B.1.1.7) and Delta (B.1.617.2) predominant<sup>1</sup>. Omicron emerged November 2021 and rapidly replaced Delta to be the predominant global strain, accounting for 90% of GISAID SARS-CoV-2 sequences<sup>2-4</sup>. The World Health Organization (WHO) has listed nine COVID-19 vaccines for emergency use, including the two most commonly used vaccines in China - BBIBP-CorV and CoronaVac inactivated whole-virus vaccines. Over 3 billion doses of these vaccines have been used in China, and 1.5 billion doses have been procured overseas<sup>5 6</sup>.

Good safety and short-term efficacy against the ancestral strain have been demonstrated for these vaccines<sup>7</sup>, and real-world evidence on protection against VOCs and protection with booster doses is available, for example, from Guangdong, Jiangsu, and Henan<sup>8-11</sup> in China and Chile and Brazil overseas<sup>12 13</sup>. In China, the Zero-COVID policy severely limits outbreak size, and very high COVID-19 primary vaccination coverage makes unvaccinated comparison groups too small and too different for conducting absolute vaccine effectiveness (VE) studies. In January 2022, two outbreaks occurred in Henan – one caused by Delta (B.1.617.2) and the other by Omicron (B.1.1.529.1) – that provided an opportunity to assess relative VE (rVE) of China-produced vaccines against COVID-19 caused by these two variants. We report results of our evaluation.

## METHODS

### Outbreak setting

The setting was Henan province where there were two simultaneous outbreaks. Henan has a population of 100 million; the three involved cities were Zhengzhou (8.6 million, whole-population primary series coverage 87.2%), Yuzhou (1.2 million, 94.7%), and Anyang (1.5 million, 80.3%). The COVID-19 vaccines used were inactivated vaccines, 91.8%; ZF2001, 7.5%; and Ad5-nCoV vaccine, 0.7%. In all of China, SARS-CoV-2 infections are traced, and contacts quarantined for at least two weeks and tested periodically in quarantine. China's immunization program records all COVID-19 vaccinations in a national vaccination database indexed by national ID number. The national COVID-19 surveillance system is also indexed by ID.

On January 2, 2022, a Yuzhou factory worker tested RT-PCR-positive in a routine pre-surgery screening. Contact tracing identified a Delta-variant community transmission chain that spread to Zhengzhou. On January 8, a medical device company employee and a middle school student tested positive when seeking health care in Anyang. Investigation revealed an Omicron outbreak in a boarding school with 4,103 students and teachers along with community transmission (**Figure 1**).

### Study design and subjects

We used a retrospective cohort design to estimate rVE. Subjects were confirmed SARS-CoV-2 infections and their close contacts, grouped by vaccination status. Outcomes were infection, pneumonia, and severe of illness.

A SARS-CoV-2 infection was a person with a positive RT-PCR, including all asymptomatic



1  
2  
3 and symptomatic infection regardless of severity; COVID-19 pneumonia was a SARS-CoV-2  
4 infection with acute onset of fever AND cough OR acute onset with any three or more of the  
5 following: fever, cough, general weakness/fatigue, headache, myalgia, sore throat, coryza,  
6 dyspnea, anorexia/nausea/vomiting, diarrhea, altered mental status; OR having chest CT imaging  
7 findings suggestive of pneumonia. Severe illness was characterized by respiratory failure with  
8 need for mechanical ventilation OR shock combined with other organ failure requiring ICU care  
9  
10  
11<sup>14</sup>.

12 Close contacts had exposure to confirmed SARS-CoV-2 infections up to four days before  
13 illness onset of symptomatic cases or the first RT-PCR-positive specimen for asymptomatic cases.  
14 Exposure included living in the same apartment, sharing a table for meals, studying, or working in  
15 the same room, or sharing a ward.

16  
17 Subject data were obtained from the local Center for Disease Control and Prevention (CDC)  
18 and included the epidemiological investigation report, transmission chain, age, gender, date of first  
19 and last exposure, mode and location of exposure, and frequency and duration of exposure. For  
20 confirmed SARS-CoV-2 infections, we reviewed medical records from designated COVID-19  
21 management hospitals in Zhengzhou and Anyang to determine clinical management, laboratory  
22 tests conducted, and chest imaging.

### 23 24 25 26 **Vaccine status**

27  
28 Without knowledge of infection status, we obtained vaccination records from the national  
29 vaccination database using subjects' national IDs. Vaccination was defined as receipt of at least  
30 one dose of COVID-19 vaccine. Partial vaccination was receipt of either one dose of an  
31 inactivated COVID-19 vaccine or two doses of an inactivated vaccine with receipt of the second  
32 dose less than 14 days before exposure. Primary vaccination was completion of two doses of  
33 inactivated vaccine 14 days or more before exposure and/or a third dose of inactivated vaccine  
34 less than 7 days of exposure. Booster vaccination was a third more than 7 days before exposure.  
35 Primary vaccination was further classified as being either <180 days before exposure or ≥180 days  
36 before exposure.  
37  
38  
39

### 40 41 **Data analysis**

42 A breakthrough infection was an RT-PCR-confirmed SARS-CoV-2 infection at least 14 days  
43 after completion of primary vaccination. We estimated unadjusted and adjusted (gender and age  
44 group) rVE against Delta and Omicron infections using a Cox regression models. The reference  
45 group was primary vaccination ≥180 days before exposure; rVE was 1-adjusted hazard ratio for  
46 COVID-19 symptomatic infection or pneumonia.  
47

48 Ninety-five percent of co-morbidities were among subjects 50 years and older. Our age  
49 groupings were under 18 years, 18 to 50 years, and over 50 years. Subjects in the Omicron and  
50 Delta outbreaks differed since the Omicron outbreak involved a fully vaccinated middle school  
51 with 94.7% of cases under 20 years of age, with its higher force of infection. We therefore  
52 conducted rVE analyses with and without subjects under 20 years of age.  
53

54 We used SAS (SAS Institute Inc., Cary, NC, USA) for statistical analysis and R (version 4.1.0)  
55 for Cox survival analysis of pneumonia. P-values < 0.05 (two-tailed) were considered statistically  
56 significant.  
57  
58  
59  
60

### Patient and Public Involvement statement:

This real-world, observational study was designed without patient or public involvement. COVID-19 is managed as a Level-1 infectious disease, and as such, investigations of outbreaks and public health effort to prevent illness and stop transmission are required of public health agencies. Subjects were not recruited into the study, as they were cases or close contacts managed in accordance with the National Health Commission's Protocol for Prevention and Control. Neither patients nor the public were involved in the conduct of the study, as testing and data aggregation were conducted under the prevention and control policy. Results will be disseminated through publicly-available scientific publications.

## RESULTS

### Subjects

Table 1 shows the characteristics of the subjects. Between January 2 and 23, 2022, a total of 6,521 SARS-CoV-2 infections and close contacts were identified in the three-city setting, among which 784 were SARS-CoV-2 infections and 5,737 were close contacts. Because of the 4,103-person middle school outbreak, subjects in the Anyang (Omicron) transmission chain were younger on average than in the Zhengzhou/Yuzhou (Delta) transmission chain (43.5% vs 23.8% < 20 years,  $p < 0.05$ ). Most (72.7%) subjects completed primary vaccination; 14.9% received 0-1 dose; and 12.4% received booster doses. In the Delta chain, the median number of days between primary vaccination and exposure was 117 days (IQR:40-134) among subjects completed primary <180 days before exposure and 196 days (IQR:191-203) among subjects completed primary  $\geq 180$  days before exposure. Respective medians in the Omicron chain were 133 days (IQR:121-138) and 203 days (IQR:196-210). Boosters were completed 20 (IQR:12-68) and 19 days (IQR:11-64) before Delta and Omicron exposure.

### Breakthrough infection

Breakthrough infection rates were 9.9% in the Delta chain and 17.8% in the Omicron chain ( $p < 0.001$ ) among subjects completing primary vaccination. By vaccination group, breakthrough rates were 10.6% (Delta) and 11.0% (Omicron) among subjects who completed primary vaccination  $\geq 180$  days ( $p > 0.05$ ); 10.1% (Delta) and 22.2% (Omicron) among subjects who completed primary vaccination <180 days ( $p < 0.001$ ); and 8.1% (Delta) and 4.9% (Omicron) among boosted subjects ( $p > 0.05$ ).

When subjects under 20 years old were excluded, breakthrough rates were 10.8% (Delta) and 10.6% (Omicron) among subjects who completed primary vaccination  $\geq 180$  days ( $p > 0.05$ ); 12.3% (Delta) and 8.7% (Omicron) among subjects who completed primary vaccination <180 days ( $p > 0.05$ ); and 7.9% (Delta) and 4.5% (Omicron) among boosted subjects ( $p > 0.05$ ).

**Table 1.** Characteristics of SARS-CoV-2 infections and close contacts in Delta and Omicron transmission chain

| Characteristics              | Delta transmission chain             |                     |                     |                                  |         | Omicron transmission chain           |                     |                     |                                  |         |
|------------------------------|--------------------------------------|---------------------|---------------------|----------------------------------|---------|--------------------------------------|---------------------|---------------------|----------------------------------|---------|
|                              | Non/Partial<br>vaccination<br>(n, %) | Primary vaccination |                     | Booster<br>vaccination<br>(n, %) | p value | Non/Partial<br>vaccination<br>(n, %) | Primary vaccination |                     | Booster<br>vaccination<br>(n, %) | p value |
|                              |                                      | ≥180 days<br>(n, %) | <180 days<br>(n, %) |                                  |         |                                      | ≥180 days<br>(n, %) | <180 days<br>(n, %) |                                  |         |
| <b>SARS-CoV-2 infections</b> |                                      |                     |                     |                                  |         |                                      |                     |                     |                                  |         |
| Subtotal                     | 49                                   | 97                  | 182                 | 51                               |         | 12                                   | 65                  | 319                 | 9                                |         |
| Gender                       |                                      |                     |                     |                                  |         |                                      |                     |                     |                                  |         |
| Female                       | 33 (67.3)                            | 53 (54.6)           | 104 (57.1)          | 34 (66.7)                        | <0.001  | 7 (58.3)                             | 42 (64.6)           | 176 (55.2)          | 5 (41.7)                         | <0.001  |
| Male                         | 16 (32.7)                            | 44 (45.4)           | 78 (42.9)           | 17 (33.3)                        |         | 5 (41.7)                             | 23 (35.4)           | 143 (44.8)          | 4 (58.3)                         |         |
| Age group (yrs)              |                                      |                     |                     |                                  |         |                                      |                     |                     |                                  |         |
| < 18                         | 8 (16.3)                             | 0 (0)               | 53 (29.1)           | 0 (0)                            | <0.001  | 2 (16.7)                             | 0 (0)               | 191 (59.9)          | 0 (0)                            | <0.001  |
| 18-49                        | 19 (38.8)                            | 54 (55.7)           | 50 (27.5)           | 31 (60.8)                        |         | 7 (58.3)                             | 45 (69.2)           | 107 (33.5)          | 7 (77.8)                         |         |
| ≥ 50                         | 22 (44.9)                            | 43 (44.3)           | 79 (43.4)           | 20 (39.2)                        |         | 3 (25.0)                             | 20 (30.8)           | 21 (6.6)            | 2 (22.2)                         |         |
| <b>Close contacts</b>        |                                      |                     |                     |                                  |         |                                      |                     |                     |                                  |         |
| Subtotal                     | 525                                  | 814                 | 1619                | 575                              |         | 386                                  | 524                 | 1120                | 174                              |         |
| Gender                       |                                      |                     |                     |                                  |         |                                      |                     |                     |                                  |         |
| Female                       | 270 (51.4)                           | 430 (52.8)          | 792 (48.9)          | 307 (53.4)                       | <0.001  | 215 (55.7)                           | 310 (59.2)          | 529 (47.2)          | 106 (60.9)                       | <0.001  |
| Male                         | 255 (48.6)                           | 384 (47.2)          | 827 (51.1)          | 268 (46.6)                       |         | 171 (44.3)                           | 214 (40.8)          | 591(52.8)           | 68 (39.1)                        |         |
| Age group (yrs)              |                                      |                     |                     |                                  |         |                                      |                     |                     |                                  |         |
| < 18                         | 149 (28.4)                           | 0 (0)               | 674 (41.6)          | 0 (0)                            | <0.001  | 100 (25.9)                           | 0 (0)               | 616 (55.0)          | 0 (0)                            | <0.001  |
| 18-49                        | 250 (47.6)                           | 598 (73.5)          | 588 (36.3)          | 421 (73.2)                       |         | 187 (48.5)                           | 366 (69.9)          | 341(30.5)           | 123 (70.7)                       |         |
| ≥ 50                         | 126 (24.0)                           | 216 (26.5)          | 357 (22.1)          | 154 (26.8)                       |         | 99 (25.6)                            | 158 (30.1)          | 163 (14.5)          | 51 (29.3)                        |         |
| Total                        | 574                                  | 911                 | 1801                | 626                              |         | 398                                  | 589                 | 1439                | 183                              |         |

### Relative Vaccine effectiveness

Table 2 shows results of the Cox regression analyses for symptomatic infection and pneumonia by Delta and Omicron variants. For both variants, univariate analysis shows that being male and booster vaccination were associated with reduced risk of symptomatic infection. Age was associated with symptomatic infection, especially among subjects  $\geq 50$  years. Cox regression adjusting for age group, gender, and vaccination status were similar in magnitude for symptomatic infection risk from Delta vs Omicron. Hazard ratios among those  $\geq 50$  years differed in direction between Delta and Omicron (2.75 and 0.56), and relative protection increased from 24% to 59% in boosted subjects. After removing subjects  $< 20$  years (primarily the school outbreak students) from the Cox regression analysis, primary vaccination  $< 180$  days and booster vaccination were both associated with protection from Delta and Omicron symptomatic infections.

For pneumonia, the relation with age was more pronounced than was the case for symptomatic infection, and more so with Delta than Omicron. Hazard ratios for pneumonia were consistent in direction, showing greater protection associated with primary vaccination  $< 180$  days and booster dose administration, regardless of variant. After excluding subjects  $< 20$  years from the Cox regression analysis, hazard ratios against pneumonia change little, except for an increase in protection (from 17% to 35%) among subjects who received primary vaccination within 180 days. Survival curve analysis results for pneumonia for each variant by vaccination status group are shown in Figure 2. Although the three vaccination groups were statistically significantly different for Delta pneumonia, there was no statistically significant difference between the two primary vaccination groups for Omicron pneumonia, although both were different from the boosted group.

There were few severe infections in the two transmission chains. There were 12 severe cases in the Delta chain, with five included in Cox analysis (2 with primary vaccination  $\geq 180$  days group, 3 cases with primary vaccination  $< 180$  days, and none in the booster vaccination group. There were no severe cases in the Omicron transmission chain.

**Table 2.** Cox regression analysis by vaccination status and by outcomes of SARS-CoV-2 infection

| Covariates                          | Delta infection for all |         |                        |         | Omicron infection for all |               |                        |         | Omicron infection for $\geq 20$ yrs |         |
|-------------------------------------|-------------------------|---------|------------------------|---------|---------------------------|---------------|------------------------|---------|-------------------------------------|---------|
|                                     | Crude HR<br>(95%CI)     | p value | Adjusted HR<br>(95%CI) | p value | Crude<br>(95%CI)          | HR<br>p value | Adjusted HR<br>(95%CI) | p value | Adjusted HR<br>(95%CI)              | p value |
| <b>Symptomatic infection</b>        |                         |         |                        |         |                           |               |                        |         |                                     |         |
| Gender                              |                         |         |                        |         |                           |               |                        |         |                                     |         |
| Female                              | Ref                     |         | Ref                    |         | Ref                       |               | Ref                    |         | Ref                                 |         |
| Male                                | 0.80 (0.64 - 1.00)      | 0.05    | 0.79 (0.63 - 0.98)     | 0.04    | 0.80 (0.65 - 0.99)        | 0.04          | 0.73 (0.59 - 0.90)     | 0.01    | 0.52(0.33 - 0.80)                   | 0.003   |
| Age group(age)                      |                         |         |                        |         |                           |               |                        |         |                                     |         |
| < 18                                | Ref                     |         | Ref                    |         | Ref                       |               | Ref                    |         |                                     |         |
| 18-49                               | 1.17 (0.84 - 1.63)      | 0.36    | 1.26 (0.87 - 1.81)     | 0.22    | 0.65 (0.52 - 0.81)        | <0.01         | 0.92(0.72 - 1.18)      | 0.5     | Ref (20-49 yrs)                     |         |
| $\geq 50$                           | 2.58 (1.86 - 3.60)      | <0.01   | 2.75 (1.94 - 3.91)     | <0.01   | 0.40 (0.28 - 0.56)        | <0.01         | 0.56 (0.39 - 0.81)     | 0.01    | 1.33(0.89 - 2.00)                   | 0.166   |
| Vaccination status                  |                         |         |                        |         |                           |               |                        |         |                                     |         |
| Primary vaccination $\geq 180$ days | Ref                     |         | Ref                    |         | Ref                       |               | Ref                    |         | Ref                                 |         |
| Primary vaccination<180 days        | 0.92 (0.72 - 1.18)      | 0.51    | 1.04 (0.79 - 1.36)     | 0.79    | 2.11 (1.60 - 2.78)        | <0.01         | 1.95 (1.43 - 2.65)     | <0.01   | 0.79(0.52 - 1.20)                   | 0.261   |
| Booster vaccination                 | 0.75 (0.53 - 1.06)      | 0.11    | 0.76 (0.54 - 1.07)     | 0.11    | 0.41 (0.20 - 0.87)        | 0.02          | 0.41(0.20 - 0.86)      | 0.02    | 0.39(0.18 - 0.86)                   | 0.019   |
| <b>Pneumonia</b>                    |                         |         |                        |         |                           |               |                        |         |                                     |         |
| Gender                              |                         |         |                        |         |                           |               |                        |         |                                     |         |
| Female                              | Ref                     |         | Ref                    |         | Ref                       |               | Ref                    |         | Ref                                 |         |
| Male                                | 0.65 (0.47 - 0.90)      | 0.01    | 0.65 (0.47 - 0.90)     | 0.01    | 0.96 (0.60 - 1.52)        | 0.85          | 0.93 (0.58 - 1.49)     | 0.77    | 0.77(0.39 - 1.54)                   | 0.457   |
| Age group (yrs)                     |                         |         |                        |         |                           |               |                        |         |                                     |         |
| < 18                                | Ref                     |         | Ref                    |         | Ref                       |               | Ref                    |         |                                     |         |
| 18-49                               | 8.61 (2.70 - 27.43)     | <0.01   | 9.11 (2.81 - 29.5)     | <0.01   | 0.88 (0.52 - 1.50)        | 0.63          | 0.89 (0.48 - 1.67)     | 0.73    | Ref (20-49 yrs)                     |         |
| $\geq 50$                           | 28.00 (8.88 - 88.40)    | <0.01   | 29.50 (9.26 - 94.0)    | <0.01   | 1.11 (0.59 - 2.07)        | 0.75          | 1.13 (0.56 - 2.27)     | 0.74    | 1.70(0.87 - 3.32)                   | 0.123   |
| Vaccination status                  |                         |         |                        |         |                           |               |                        |         |                                     |         |
| Primary vaccination $\geq 180$ days | Ref                     |         | Ref                    |         | Ref                       |               | Ref                    |         | Ref                                 |         |
| Primary vaccination<180 days        | 0.60 (0.43 - 0.83)      | 0.01    | 0.86 (0.61 - 1.20)     | 0.37    | 0.84 (0.51 - 1.37)        | 0.48          | 0.83 (0.46 - 1.50)     | 0.53    | 0.65(0.32 - 1.32)                   | 0.231   |
| Booster vaccination                 | 0.38 (0.22 - 0.64)      | <0.01   | 0.38 (0.23 - 0.66)     | <0.01   | 0.13 (0.02 - 0.97)        | 0.047         | 0.13 (0.02 - 0.97)     | 0.047   | 0.15(0.02 - 1.08)                   | 0.059   |

## DISCUSSION

We used a 748-case, two-variant COVID-19 outbreak in Henan province to determine the relative vaccine effectiveness of the vaccines used in China to protect against symptomatic infection and pneumonia. Our study found an rVE of 62% against Delta pneumonia and 87% against Omicron pneumonia among homologous inactivated vaccine booster-dose recipients compared with individuals who received complete primary vaccination greater than 180 days prior to exposure to SARS-CoV-2. Relative VE was lower for individuals receiving primary vaccination less than 180 days prior to exposure than among boosted individuals, demonstrating an effectiveness advantage of the homologous booster dose. Results from our study support the current COVID-19 booster vaccination strategy in China in which everyone 18 years and older is recommended to receive a booster dose six months after their primary series.

Our study also found a higher breakthrough infection rate in the Omicron transmission chain than the Delta chain (22% vs 10%) and found no severe Omicron cases and only 12 severe Delta cases - 3% of the Delta outbreak. The low rate of severe infection provides information valuable for projection of health care resource needs in the future.

In licensure clinical trials for vaccines produced in China estimates of efficacy against symptomatic COVID-19 were 50% to 78%<sup>15 16</sup>. Our relative VE estimates are not directly comparable, since efficacy estimates are absolute rather than relative estimates. A relative VE estimate only indicates additional VE above and beyond an unmeasured absolute VE of the comparison group. There have been several real-world assessments of VE of the China-produced vaccines<sup>8-11</sup>, but none that compare rVE against Delta and Omicron in simultaneous outbreaks, and few studies of relative VE from a booster dose of China-produced vaccine.

As of March 14, 2022, 457 million confirmed cases of COVID-19 and 6 million COVID-19 deaths were reported worldwide to the World Health Organization (WHO)<sup>17</sup>. To stop the virus from raging around the world, vaccines had high hopes. In less than a year after SARS-CoV-2 emergence, COVID-19 vaccines were developed via several technologies<sup>18</sup> and have been approved by regulators and WHO for emergency use. WHO approved the two inactivated vaccines that comprised the vast majority of COVID-19 vaccines used in China and included in our study.

In the real world, several studies reported high effectiveness of mRNA-based vaccines against SARS-CoV-2 infection, with a breakthrough infection of less than 1% of symptomatic SARS-CoV-2 infections, and a ~0.1% rate of hospitalization or death<sup>19 20</sup>. However, rapid decrease of neutralizing antibody levels in the first 3-month after the second dose was observed<sup>21</sup>, accompanied by the significant decline of protection six month after completion of two-dose regimen<sup>22 23</sup>. However, a third dose could significantly restore protection, especially protection against severe COVID-19-related outcomes. In large observational studies conducted in Israel, compared with two doses regimen completed at least 5 months previously, adding a third dose was estimated to be > 90% effective in preventing severe outcomes of SARS-CoV-2 infections<sup>24 25</sup>. Also in Israel, among residents of long-term care facilities, a relative reduction of 71% and 80% on preventing SARS-CoV-2 infection and hospitalization were observed after receiving third doses<sup>26</sup>. In China, inactivated vaccines were implemented widely, and a similar decline of neutralizing titers was also observed. Homologous booster effectiveness of inactivated vaccines has been illustrated in clinical trials<sup>7 27</sup>, however, due to the zero-COVID-19 policy in China, it is



1  
2  
3 challenging to measure real world protection in China - especially protection against Omicron  
4 infections.  
5

6 The number of studies of COVID-19 VE against Omicron is growing. VEs of mRNA vaccines  
7 and adenovirus vector vaccines against Omicron were significantly lower than against Delta. At  
8 the end of 2021, a real world study on VE against Omicron pneumonia in South Africa showed  
9 that VE of Pfizer mRNA vaccine was 70%<sup>2</sup>. VE against infection was limited and VE against  
10 hospitalization decreased significantly with time since vaccination (82% within 14 days, 52%  
11 between 15 and 179 days, and 38% over 180 days). However, after a homologous booster dose,  
12 VE against hospitalization caused by Delta and Omicron increased to 94% and 90%. Although our  
13 study measured relative VE, the booster dose impact appears consistent, showing that booster  
14 vaccination improves protective effectiveness of the vaccines<sup>3 28</sup>.  
15

16 We found a higher breakthrough infection rate for Omicron than Delta exposure. A likely  
17 explanation is that most Omicron transmission was in a large boarding middle school. The  
18 crowded student dormitories, class rooms, and canteens may greatly increase pathogen exposure,  
19 leading to reduced protection<sup>29</sup>. After receiving boosters, we observed significantly lower  
20 breakthrough rates for Delta (22% vs 8%) and Omicron exposure (10% vs 5%). Immunity elicited  
21 by COVID-19 vaccines wanes over time<sup>30</sup>, and giving booster doses is necessary for restoration<sup>4 31</sup>  
22  
23  
24  
25  
26

27 Age was risk factor for pneumonia in our study. The hazard ratio among people over 50 years  
28 old was higher than in people under 18 years old for Delta pneumonia. Hypo-responsiveness  
29 among the elderly has been reported from clinical studies of COVID-19 vaccines<sup>19 33 34</sup>. Due to  
30 immunosenescence, elderly have a lower ability to fight respiratory infections and are  
31 hyporesponsive to vaccination<sup>35 36</sup>.  
32

33 There are several limitations in our study. First, the age distributions in the Delta and Omicron  
34 transmission chains were different. Delta transmission occurred in a community, while Omicron  
35 transmission was concentrated in a middle school. The imbalance in age did not appear to  
36 influence the relative VE of booster doses against Delta and Omicron in age-based sensitivity  
37 analysis. Second, we did not have data on comorbidities of most subjects. We therefore could not  
38 use comorbidities in the Cox regression model. Comorbidity data were available in a small  
39 subgroup, however, and these data indicated that more than 80% of comorbidity occurred in  
40 people  $\geq 50$  years. We therefore used 50 years of age as a cut-off for age group aggregation.  
41 Third, because coverage was very high at 90%, there were too few unvaccinated people to serve as  
42 control to measure absolute vaccine effectiveness. The small number of unvaccinated individuals  
43 are likely to be significantly different than vaccinated people, making them an unreliable control  
44 group. We therefore excluded subjects who did not complete primary vaccination, and instead  
45 used the numerous subjects who completed the primary vaccination  $\geq 180$  days as reference to  
46 measure the relative VE throughout the analysis. Finally, the outbreak was too small and the  
47 subjects too few to assess rVE for the different vaccines. Since almost all of the vaccine used in  
48 Henan (and China) are the two inactivated vaccines in our study, we believe it is reasonable to  
49 conclude that we assessed rVE for China's inactivated vaccines, especially the homologous  
50 booster dose, and that our results can generalize to the rest of mainland China. However, our study  
51 results cannot generalize to other countries.  
52  
53  
54  
55  
56  
57

## 58 Conclusion

59  
60

1  
2  
3 Overall, protection against both Delta and Omicron variants declined over the time, especially  
4 after 6 months of primary vaccination. However, a booster dose of inactivated vaccines can restore  
5 and enhance protection against both variants.  
6  
7  
8  
9  
10  
11  
12  
13  
14  
15  
16  
17  
18  
19  
20  
21  
22  
23  
24  
25  
26  
27  
28  
29  
30  
31  
32  
33  
34  
35  
36  
37  
38  
39  
40  
41  
42  
43  
44  
45  
46  
47  
48  
49  
50  
51  
52  
53  
54  
55  
56  
57  
58  
59  
60

For peer review only



## Acknowledgements

We are very grateful for the data collection efforts by local CDC and infectious hospital staff of Zhengzhou, Yuzhou, and Anyang cities in Henan province. We are very grateful to Yaowen Zhang, Yang Liu (Beijing Institute of Biological Products CO., LTD, SINOPHARM), and Xiaobin Cao and Yupeng Liang (Sinovac Research & Development Co., Ltd) for help with data extraction and running SAS code for data analysis.

## Contributors

ZDY, ZYW, XYW, XYL and YMS acquired funding and contributed to the study's conception and design. ABW, RZ, ZHQ, FZW, HZ, ZJ and YY conceptualized the study and prepared the original study protocol, which was subsequently reviewed by LER. DW, LT, and CH developed the statistical methods. DW, CH and XYW wrote and tested the SAS code for the data analysis and drafted the manuscript. YY, HFW, YYZ, JJP, YFL, MXL, CSW and YTM collected data from local CDCs and abstracted the data. DW, LT, LER ZJA, ZDY and YMS interpreted the results and revised the manuscript and critically reviewed the manuscript. All authors approved the final submitted version.

## Funding

This work was supported by the Operation of Public Health Emergency Response Mechanism of Chinese Center for Disease Control and Prevention (131031001000150001).

## Competing interests

All authors declare no competing interests.

## Ethical approval

COVID-19 is a class A notifiable infectious disease according to the Law on the Prevention and Control of Infectious Diseases (SCSNPC, 1989) in China; case reporting and investigation are mandatory. This study was approved by the Institutional Review Board of Chinese Center for Disease Control and Prevention (Approval Notice:202101-01).

## Data sharing

The data can be assessed from the China Information System for Disease Control and Prevention by researchers who meet the criteria for access to confidential data (for the criteria for access and details of how to request access see <https://www.phsciencedata.cn/Share/en/index.jsp>).

## References

1. World Health Organization. Weekly epidemiological update on COVID-19 - 22 February 2022. 2022; 80.
2. Collie S, Champion J, Moultrie H, et al. Effectiveness of BNT162b2 Vaccine against Omicron Variant in South Africa. *The New England journal of medicine* 2022;386(5):494-96. doi: 10.1056/NEJMc2119270
3. Hansen CH, Schelde AB, Moustsen-Helm IR, et al. Vaccine effectiveness against SARS-CoV-2 infection with the Omicron or Delta variants following a two-dose or booster BNT162b2 or mRNA-1273 vaccination series: A Danish cohort study. *medRxiv* 2021:2021.12.20.21267966. doi: 10.1101/2021.12.20.21267966
4. Thompson MG, Natarajan K, Irving SA, et al. Effectiveness of a Third Dose of mRNA Vaccines Against COVID-19-Associated Emergency Department and Urgent Care Encounters and Hospitalizations Among Adults During Periods of Delta and Omicron Variant Predominance - VISION Network, 10 States, August 2021-January 2022. *MMWR Morb Mortal Wkly Rep* 2022;71(4):139-45. doi: 10.15585/mmwr.mm7104e3 [published Online First: 2022/01/28]
5. Immunisation TGAfVa. COVAX Global Supply Forecast. 2021. <https://www.gavi.org/sites/default/files/covid/covax/COVAX-Supply-Forecast.pdf>.
6. World Health Organization. Covid-19 Vaccines [Available from: <https://www.who.int/teams/regulation-prequalification/eul/covid-19>].
7. Zeng G, Wu Q, Pan H, et al. Immunogenicity and safety of a third dose of CoronaVac, and immune persistence of a two-dose schedule, in healthy adults: interim results from two single-centre, double-blind, randomised, placebo-controlled phase 2 clinical trials. *Lancet Infect Dis* 2021 doi: 10.1016/s1473-3099(21)00681-2 [published Online First: 20211207]
8. Hu Z, Tao B, Li Z, et al. Effectiveness of inactivated COVID-19 vaccines against severe illness in B.1.617.2 (Delta) variant-infected patients in Jiangsu, China. *Int J Infect Dis* 2022;116:204-09. doi: 10.1016/j.ijid.2022.01.030 [published Online First: 20220119]
9. Dan Wu YZ, Lin Tang, Fuzhen Wang, Ying Ye, Chao Ma, Hui Zheng, Wenzhou Yu, Lei Cao, Yifan Song, Abuduwaili Reyimu, Xiaoxiao Zhang, Haifeng Wang, Yifei Nie, Mingxia Lu, Muge Qi, Jun Li, Ruolin Wang, Kaichao Yang, Changshuang Wang, Lawrence Everett Rodewald, Geroge Fu Gao, Zhijie An, Zundong Yin. Effectiveness of Inactivated COVID-19 Vaccines Against Symptomatic, Pneumonia, and Severe Disease Caused by the Delta Variant: Real World Study and Evidence — China, 2021. *China CDC Wkly* 2022;4(4):57-65.
10. Kang M, Yi Y, Li Y, et al. Effectiveness of Inactivated COVID-19 Vaccines Against Illness Caused by the B.1.617.2 (Delta) Variant During an Outbreak in Guangdong, China : A Cohort Study. *Annals of internal medicine* 2022 doi: 10.7326/m21-3509 [published Online First: 2022/02/01]
11. Li XN, Huang Y, Wang W, et al. Effectiveness of inactivated SARS-CoV-2 vaccines against the Delta variant infection in Guangzhou: a test-negative case-control real-world study. *Emerg Microbes Infect* 2021;10(1):1751-59. doi: 10.1080/22221751.2021.1969291 [published Online First: 2021/08/17]
12. Jara A, Undurraga EA, Gonzalez C, et al. Effectiveness of an Inactivated SARS-CoV-2 Vaccine in Chile. *The New England journal of medicine* 2021;385(10):875-84. doi: 10.1056/NEJMoa2107715 [published Online First: 2021/07/08]
13. Hitchings MDT, Ranzani OT, Torres MSS, et al. Effectiveness of CoronaVac among healthcare workers in the setting of high SARS-CoV-2 Gamma variant transmission in Manaus, Brazil: A test-negative case-control study. *Lancet Reg Health Am* 2021;1:100025. doi: 10.1016/j.lana.2021.100025 [published Online First: 2021/08/14]
14. TGOoNHCNT. A. Diagnosis and Treatment Protocol for COVID-19 Patients (Tentative 8th Edition). *Infectious Diseases & Immunity* 2021;1(1):8-16.
15. Al Kaabi N, Zhang Y, Xia S, et al. Effect of 2 Inactivated SARS-CoV-2 Vaccines on Symptomatic COVID-19 Infection in Adults: A Randomized Clinical Trial. *Jama* 2021;326(1):35-45. doi: 10.1001/jama.2021.8565

[published Online First: 2021/05/27]

16. Palacios RaB, Ana Paula and Albuquerque, Camila Santos Nascimento and Patiño, Elizabeth González and Santos, Joane do Prado and Tilli Reis Pessoa Conde, Mônica and Piorelli, Roberta de Oliveira and Pereira Júnior, Luiz Carlos and Raboni, Sonia Mara and Ramos, Fabiano and Sierra Romero, Gustavo Adolfo and Leal, Fábio Eudes and Camargo, Luis Fernando Aranha and Aoki, Francisco Hideo and Coelho, Eduardo Barbosa and Oliveira, Danise Senna and Fontes, Cor Jesus Fernandes and Pileggi, Gecilmara Cristina Salviato and Oliveira, Ana Lúcia Lyrio de and Siqueira, André Machado de and Oliveira, Danielle Bruna Leal de and Botosso, Viviane Fongaro and Zeng, Gang and Xin, Qianqian and Teixeira, Mauro Martins and Nogueira, Maurício Lacerda and Kallas, Esper Georges,. Efficacy and Safety of a COVID-19 Inactivated Vaccine in Healthcare Professionals in Brazil: The PROFISCOV Study. <https://ssrn.com/abstract=3822780>.

17. Organization WH. WHO Coronavirus (COVID-19) Dashboard 2022 [Available from: <https://covid19.who.int/> accessed March 2 2022.

18. Krammer F. SARS-CoV-2 vaccines in development. *Nature* 2020;586(7830):516-27. doi: 10.1038/s41586-020-2798-3 [published Online First: 2020/09/24]

19. Polack FP, Thomas SJ, Kitchin N, et al. Safety and Efficacy of the BNT162b2 mRNA Covid-19 Vaccine. *The New England journal of medicine* 2020;383(27):2603-15. doi: 10.1056/NEJMoa2034577 [published Online First: 2020/12/11]

20. Haas EJ, Angulo FJ, McLaughlin JM, et al. Impact and effectiveness of mRNA BNT162b2 vaccine against SARS-CoV-2 infections and COVID-19 cases, hospitalisations, and deaths following a nationwide vaccination campaign in Israel: an observational study using national surveillance data. *Lancet* 2021;397(10287):1819-29. doi: 10.1016/s0140-6736(21)00947-8 [published Online First: 2021/05/09]

21. Levin EG, Lustig Y, Cohen C, et al. Waning Immune Humoral Response to BNT162b2 Covid-19 Vaccine over 6 Months. *The New England journal of medicine* 2021;385(24):e84. doi: 10.1056/NEJMoa2114583 [published Online First: 2021/10/07]

22. Goldberg Y, Mandel M, Bar-On YM, et al. Waning Immunity after the BNT162b2 Vaccine in Israel. *The New England journal of medicine* 2021;385(24):e85. doi: 10.1056/NEJMoa2114228 [published Online First: 2021/10/28]

23. Chemaitelly H, Tang P, Hasan MR, et al. Waning of BNT162b2 Vaccine Protection against SARS-CoV-2 Infection in Qatar. *The New England journal of medicine* 2021;385(24):e83. doi: 10.1056/NEJMoa2114114 [published Online First: 2021/10/07]

24. Barda N, Dagan N, Cohen C, et al. Effectiveness of a third dose of the BNT162b2 mRNA COVID-19 vaccine for preventing severe outcomes in Israel: an observational study. *Lancet* 2021;398(10316):2093-100. doi: 10.1016/s0140-6736(21)02249-2 [published Online First: 2021/11/11]

25. Arbel R, Hammerman A, Sergienko R, et al. BNT162b2 Vaccine Booster and Mortality Due to Covid-19. *The New England journal of medicine* 2021;385(26):2413-20. doi: 10.1056/NEJMoa2115624 [published Online First: 2021/12/09]

26. Muhsen K, Maimon N, Mizrahi A, et al. Effects of BNT162b2 Covid-19 Vaccine Booster in Long-Term Care Facilities in Israel. *The New England journal of medicine* 2022;386(4):399-401. doi: 10.1056/NEJMc2117385 [published Online First: 2021/12/23]

27. Zhang Y, Yang Y, Qiao N, et al. Early assessment of the safety and immunogenicity of a third dose (booster) of COVID-19 immunization in Chinese adults. *Frontiers of medicine* 2022:1-9. doi: 10.1007/s11684-021-0914-x [published Online First: 2022/02/06]

28. Tang P, Hasan MR, Chemaitelly H, et al. BNT162b2 and mRNA-1273 COVID-19 vaccine effectiveness against the SARS-CoV-2 Delta variant in Qatar. *Nat Med* 2021;27(12):2136-43. doi: 10.1038/s41591-021-01583-4 [published Online First: 2021/11/04]

- 1  
2  
3  
4  
5  
6  
7  
8  
9  
10  
11  
12  
13  
14  
15  
16  
17  
18  
19  
20  
21  
22  
23  
24  
25  
26  
27  
28  
29  
30  
31  
32  
33  
34  
35  
36  
37  
38  
39  
40  
41  
42  
43  
44  
45  
46  
47  
48  
49  
50  
51  
52  
53  
54  
55  
56  
57  
58  
59  
60
29. Langwig KE, Gomes MGM, Clark MD, et al. Limited available evidence supports theoretical predictions of reduced vaccine efficacy at higher exposure dose. *Scientific reports* 2019;9(1):3203. doi: 10.1038/s41598-019-39698-x [published Online First: 2019/03/03]
30. GeurtsvanKessel CH, Geers D, Schmitz KS, et al. Divergent SARS CoV-2 Omicron-reactive T- and B cell responses in COVID-19 vaccine recipients. *Science immunology* 2022:eabo2202. doi: 10.1126/sciimmunol.abo2202 [published Online First: 2022/02/04]
31. Gupta RK, Topol EJ. COVID-19 vaccine breakthrough infections. *Science* 2021;374(6575):1561-62. doi: 10.1126/science.abl8487 [published Online First: 2021/12/24]
32. Petersen M, Schwab J, Havlir DV. SARS-CoV-2 vaccine boosters: The time to act is now. *PLoS medicine* 2021;18(12):e1003882. doi: 10.1371/journal.pmed.1003882 [published Online First: 2021/12/10]
33. Baden LR, El Sahly HM, Essink B, et al. Efficacy and Safety of the mRNA-1273 SARS-CoV-2 Vaccine. *The New England journal of medicine* 2021;384(5):403-16. doi: 10.1056/NEJMoa2035389 [published Online First: 2020/12/31]
34. Andrews N, Tessier E, Stowe J, et al. Duration of Protection against Mild and Severe Disease by Covid-19 Vaccines. *The New England journal of medicine* 2022;386(4):340-50. doi: 10.1056/NEJMoa2115481 [published Online First: 2022/01/13]
35. Crooke SN, Ovsyannikova IG, Poland GA, et al. Immunosenescence and human vaccine immune responses. *Immunity & ageing : I & A* 2019;16:25. doi: 10.1186/s12979-019-0164-9 [published Online First: 2019/09/19]
36. Oh SJ, Lee JK, Shin OS. Aging and the Immune System: the Impact of Immunosenescence on Viral Infection, Immunity and Vaccine Immunogenicity. *Immune network* 2019;19(6):e37. doi: 10.4110/in.2019.19.e37 [published Online First: 2020/01/11]

## LEGEND OF FIGURES

**Figure 1.** Epidemic curves of Delta and Omicron transmission between December 26, 2021 and January 23, 2022.

**1a** showed the COVID-19 epidemic curve with number of cases plotted by date of patient onset of symptoms from December 26, 2021 to January 16, 2022 in Delta transmission chain. Confirmed, and asymptomatic cases are stacked to show total daily cases by date of symptom onset. The peak onset of symptoms for all cases overall occurred between January 5 and 10., 2022. Since then, onset of illness has declined.

**1b** showed the COVID-19 epidemic curve for confirmed cases only with number of cases plotted by date of patients' onset of symptoms from January 04, 2022 to January 23, 2022 in Omicron transmission chain. The confirmed cases onset of illness peaked between January 9 and 16.

**Figure 2.** Survival curves of pneumonia caused by Delta and Omicron variants

**2a** and **2b** shown are Cox model estimates of the survival probability of pneumonia with the Delta and Omicron variant of SARS-CoV-2 according to vaccination status with adjusting gender and age, the start time of follow up since December 15, 2021.

**Figure 1.** Epidemic curves of SARS-CoV-2 infections in Zhengzhou/Yuzhou and Anyang between December 26, 2021 and January 23, 2022. Summary of subjects

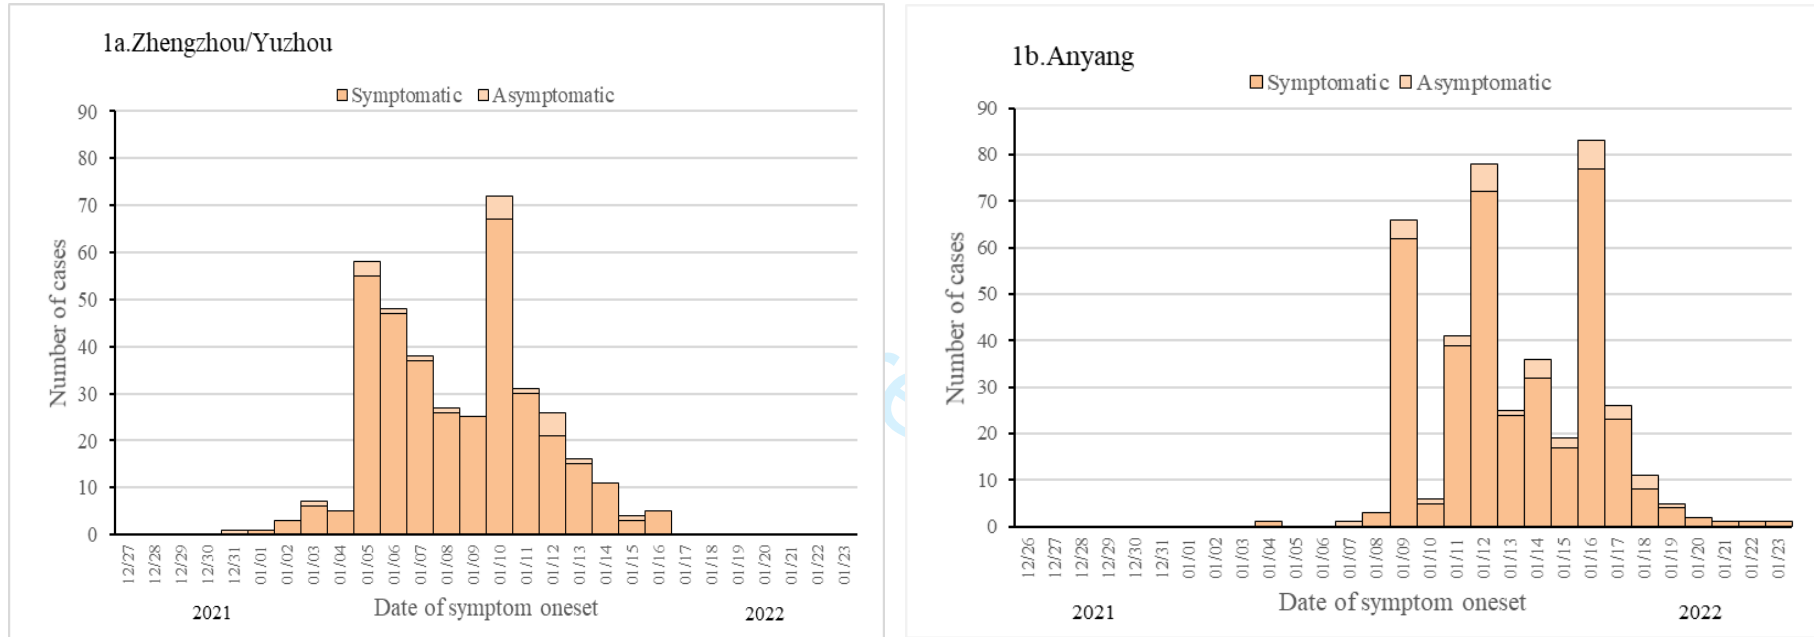

Figure 2. Survival curves of pneumonia caused by Delta and Omicron variants.

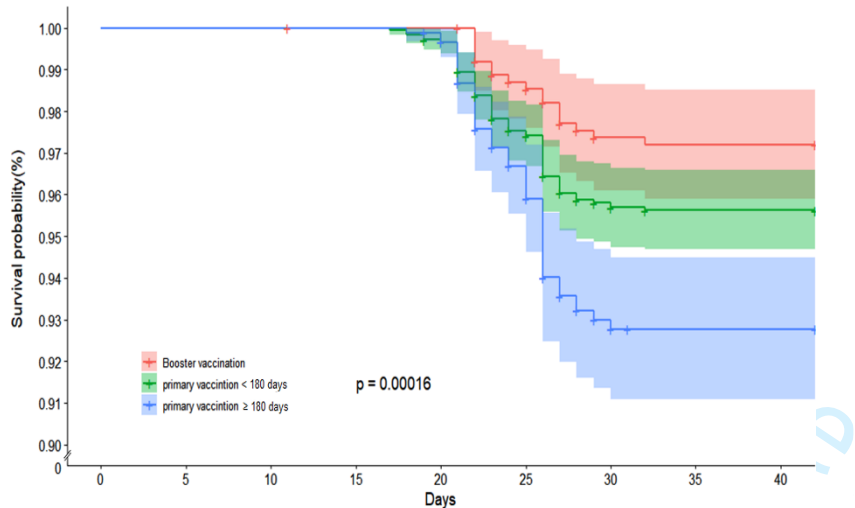

|                                | 0    | 5    | 10   | 15   | 20   | 25   | 30   | 35   | 40   |
|--------------------------------|------|------|------|------|------|------|------|------|------|
| Booster vaccination            | 626  | 626  | 626  | 625  | 625  | 601  | 576  | 575  | 575  |
| primary vaccination < 180 days | 1801 | 1801 | 1801 | 1801 | 1794 | 1711 | 1628 | 1619 | 1619 |
| primary vaccination ≥ 180 days | 911  | 911  | 911  | 911  | 909  | 867  | 822  | 814  | 814  |

2a. Delta

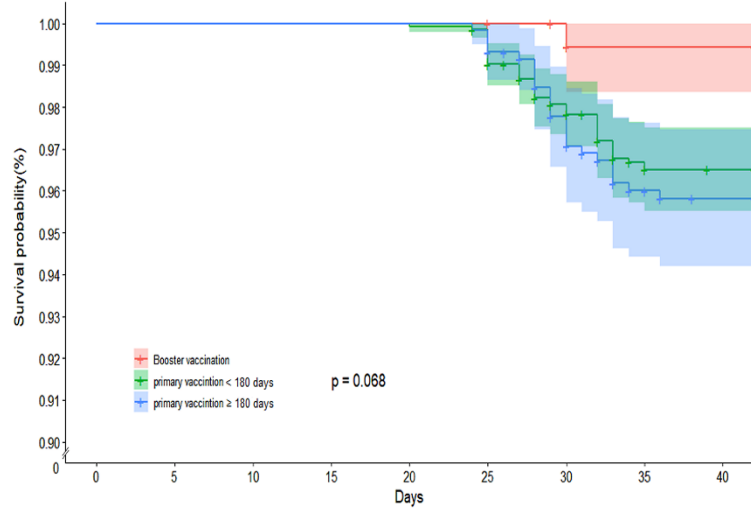

|                                | 0    | 5    | 10   | 15   | 20   | 25   | 30   | 35   | 40   |
|--------------------------------|------|------|------|------|------|------|------|------|------|
| Booster vaccination            | 183  | 183  | 183  | 183  | 183  | 183  | 179  | 174  | 174  |
| primary vaccination < 180 days | 1439 | 1439 | 1439 | 1439 | 1439 | 1436 | 1253 | 1124 | 1120 |
| primary vaccination ≥ 180 days | 589  | 589  | 589  | 589  | 589  | 588  | 562  | 529  | 524  |

2b. Omicron

# BMJ Open

## Relative vaccine effectiveness against Delta and Omicron COVID-19 after homologous inactivated vaccine boosting: a retrospective cohort study

|                               |                                                                                                                                                                                                                                                                                                                                                                                                                                                                                                                                                                                                                                                                                                                                                                                                                                                                                                                                                                                                                                                                                                                                                                                                                                                                                                                                                                                                                                                                                                                                                                                                                                                                                                                                                                                                                                                                                                                                                                                                                                                                                                                                                                                                                                                                       |
|-------------------------------|-----------------------------------------------------------------------------------------------------------------------------------------------------------------------------------------------------------------------------------------------------------------------------------------------------------------------------------------------------------------------------------------------------------------------------------------------------------------------------------------------------------------------------------------------------------------------------------------------------------------------------------------------------------------------------------------------------------------------------------------------------------------------------------------------------------------------------------------------------------------------------------------------------------------------------------------------------------------------------------------------------------------------------------------------------------------------------------------------------------------------------------------------------------------------------------------------------------------------------------------------------------------------------------------------------------------------------------------------------------------------------------------------------------------------------------------------------------------------------------------------------------------------------------------------------------------------------------------------------------------------------------------------------------------------------------------------------------------------------------------------------------------------------------------------------------------------------------------------------------------------------------------------------------------------------------------------------------------------------------------------------------------------------------------------------------------------------------------------------------------------------------------------------------------------------------------------------------------------------------------------------------------------|
| Journal:                      | <i>BMJ Open</i>                                                                                                                                                                                                                                                                                                                                                                                                                                                                                                                                                                                                                                                                                                                                                                                                                                                                                                                                                                                                                                                                                                                                                                                                                                                                                                                                                                                                                                                                                                                                                                                                                                                                                                                                                                                                                                                                                                                                                                                                                                                                                                                                                                                                                                                       |
| Manuscript ID                 | bmjopen-2022-063919.R1                                                                                                                                                                                                                                                                                                                                                                                                                                                                                                                                                                                                                                                                                                                                                                                                                                                                                                                                                                                                                                                                                                                                                                                                                                                                                                                                                                                                                                                                                                                                                                                                                                                                                                                                                                                                                                                                                                                                                                                                                                                                                                                                                                                                                                                |
| Article Type:                 | Original research                                                                                                                                                                                                                                                                                                                                                                                                                                                                                                                                                                                                                                                                                                                                                                                                                                                                                                                                                                                                                                                                                                                                                                                                                                                                                                                                                                                                                                                                                                                                                                                                                                                                                                                                                                                                                                                                                                                                                                                                                                                                                                                                                                                                                                                     |
| Date Submitted by the Author: | 13-Sep-2022                                                                                                                                                                                                                                                                                                                                                                                                                                                                                                                                                                                                                                                                                                                                                                                                                                                                                                                                                                                                                                                                                                                                                                                                                                                                                                                                                                                                                                                                                                                                                                                                                                                                                                                                                                                                                                                                                                                                                                                                                                                                                                                                                                                                                                                           |
| Complete List of Authors:     | <p>Tang, Lin; Chinese Center for Disease Control and Prevention, National Immunization Program</p> <p>Zhang, Yanyang; Henan Provincial Center for Disease Control and Prevention</p> <p>Wang, Fuzhen; Chinese Center for Disease Control and Prevention</p> <p>Wu, Dan; Chinese Center for Disease Control and Prevention</p> <p>Qian, Zhao-Hui; NHC Key laboratory of Systems Biology of Pathogens, Institute of Pathogen Biology, Chinese Academy of Medical Sciences and Peking Union Medical College, Beijing, China</p> <p>Zhang, Rui; National Center for Clinical Laboratories, Beijing Hospital, National Center of Gerontology; Institute of Geriatric Medicine, Chinese Academy of Medical Sciences</p> <p>Wang, Ai-Bin; Beijing Ditan Hospital Capital Medical University</p> <p>Huang, Chang; Chinese Center for Disease Control and Prevention; China Field Epidemiology Training Program</p> <p>Wang, Haifeng; Henan Provincial Center for Disease Control and Prevention</p> <p>Ye, Ying; Henan Provincial Center for Disease Control and Prevention</p> <p>Lu, Mingxia; Henan Provincial Center for Disease Control and Prevention</p> <p>Wang, Changshuang; Henan Provincial Center for Disease Control and Prevention</p> <p>Ma, Ya-ting; Henan Province Center for Disease Control and Prevention</p> <p>Pan, Jingjing; Henan Province Center for Disease Control and Prevention</p> <p>Li, Ya-fei; Henan Province Center for Disease Control and Prevention</p> <p>Lv, Xiao-Ya; Development Center for Medicine and Science &amp;Technology, National Health Commission</p> <p>An, Zhijie; Chinese Center for Disease Control and Prevention, National Immunization Program</p> <p>Rodewald, Lance; Chinese Center for Disease Control and Prevention, National Immunization Program</p> <p>Wang, Xuan-Yi; Fudan University</p> <p>Shao, Yi-Ming; State Key Laboratory of Infectious Disease Prevention and Control, National Center for AIDS/STD Control and Prevention, Chinese Center for Disease Control and Prevention</p> <p>Wu, Zhi-Yin; Development Center for Medicine and Science &amp;Technology, National Health Commission</p> <p>Yin, Zundong; Chinese Center for Disease Control and Prevention, National Immunization Program</p> |



1  
2  
3  
4  
5  
6  
7  
8  
9  
10  
11  
12  
13  
14  
15  
16  
17  
18  
19  
20  
21  
22  
23  
24  
25  
26  
27  
28  
29  
30  
31  
32  
33  
34  
35  
36  
37  
38  
39  
40  
41  
42  
43  
44  
45  
46  
47  
48  
49  
50  
51  
52  
53  
54  
55  
56  
57  
58  
59  
60

|                                   |                                                                                        |
|-----------------------------------|----------------------------------------------------------------------------------------|
| <b>Primary Subject Heading:</b>   | Epidemiology                                                                           |
| <b>Secondary Subject Heading:</b> | Public health, Infectious diseases                                                     |
| <b>Keywords:</b>                  | COVID-19, Epidemiology < INFECTIOUS DISEASES, Immunology < NATURAL SCIENCE DISCIPLINES |
|                                   |                                                                                        |

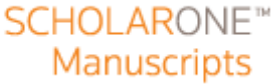

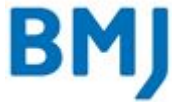

I, the Submitting Author has the right to grant and does grant on behalf of all authors of the Work (as defined in the below author licence), an exclusive licence and/or a non-exclusive licence for contributions from authors who are: i) UK Crown employees; ii) where BMJ has agreed a CC-BY licence shall apply, and/or iii) in accordance with the terms applicable for US Federal Government officers or employees acting as part of their official duties; on a worldwide, perpetual, irrevocable, royalty-free basis to BMJ Publishing Group Ltd ("BMJ") its licensees and where the relevant Journal is co-owned by BMJ to the co-owners of the Journal, to publish the Work in this journal and any other BMJ products and to exploit all rights, as set out in our [licence](#).

The Submitting Author accepts and understands that any supply made under these terms is made by BMJ to the Submitting Author unless you are acting as an employee on behalf of your employer or a postgraduate student of an affiliated institution which is paying any applicable article publishing charge ("APC") for Open Access articles. Where the Submitting Author wishes to make the Work available on an Open Access basis (and intends to pay the relevant APC), the terms of reuse of such Open Access shall be governed by a Creative Commons licence – details of these licences and which [Creative Commons](#) licence will apply to this Work are set out in our licence referred to above.

Other than as permitted in any relevant BMJ Author's Self Archiving Policies, I confirm this Work has not been accepted for publication elsewhere, is not being considered for publication elsewhere and does not duplicate material already published. I confirm all authors consent to publication of this Work and authorise the granting of this licence.

1  
2  
3  
4  
5  
6  
7  
8  
9  
10  
11  
12  
13  
14  
15  
16  
17  
18  
19  
20  
21  
22  
23  
24  
25  
26  
27  
28  
29  
30  
31  
32  
33  
34  
35  
36  
37  
38  
39  
40  
41  
42  
43  
44  
45  
46  
47  
48  
49  
50  
51  
52  
53  
54  
55  
56  
57  
58  
59  
60

## Relative vaccine effectiveness against Delta and Omicron COVID-19 after homologous inactivated vaccine boosting: a retrospective cohort study

Lin Tang<sup>1\*</sup>, Yan-Yang Zhang<sup>2\*</sup>, Fu-Zhen Wang<sup>1</sup>, Dan Wu<sup>1</sup>, Zhao-Hui Qian<sup>3</sup>, Rui Zhang<sup>4</sup>, Ai-Bin Wang<sup>5</sup>, Chang Huang<sup>1,6</sup>, Hai-feng Wang<sup>2</sup>, Ying Ye<sup>2</sup>, Ming-Xia Lu<sup>2</sup>, Chang-Shuang Wang<sup>2</sup>, Ya-ting Ma<sup>2</sup>, Jingjing Pan<sup>2</sup>, Ya-fei Li<sup>2</sup>, Xiao-Ya Lv<sup>7</sup>, Zhi-Jie An<sup>1</sup>, Lance E. Rodewald<sup>1</sup>, Xuan-Yi Wang<sup>8&</sup>, Yi-Ming Shao<sup>9&</sup>, Zhi-Yin Wu<sup>7&</sup>, Zun-Dong Yin<sup>1&</sup>

\***Joint first authors:** Lin Tang and Yan-yang Zhang contributed equally to this work.

&**Joint corresponding authors:**

**Zun-dong Yin:**

27 Nanwei Road; Beijing; Xicheng District; China; 100050

Email: [yinzd@chinacdc.cn](mailto:yinzd@chinacdc.cn); Phone: +86 630 27946; Fax: +86 631 71724

**Yi-Ming Shao:**

155 Changbai Road; Beijing; China; 102206

E-mail: [yshao@chinaaids.cn](mailto:yshao@chinaaids.cn) Phone: 010-58900922

**Zhi-Yin Wu:**

Number 9 Chegongzhuang Street; Xicheng District; Beijing; 100037

E-mail: [zhiyinwu@126.com](mailto:zhiyinwu@126.com); Phone: 010- 88387238

**Xuan-Yi Wang:**

138 Yi Xue Yuan Road; Shanghai; China 200032

E-mail: [xywang@shmu.edu.cn](mailto:xywang@shmu.edu.cn); Phone: 021-54237865

1. National Immunization Program, Chinese Center for Disease Control and Prevention; Beijing, China
2. Immunization Program; Henan Provincial Disease Control and Prevention; Zhengzhou; China
3. Key Laboratory of Systems Biology of Pathogens, Institute of Pathogen Biology; National Health Commission; Chinese Academy of Medical Sciences; Peking Union Medical College; Beijing; China
4. National Center for Clinical Laboratories, Beijing Hospital, National Center of Gerontology; Institute of Geriatric Medicine, Chinese Academy of Medical Sciences; China
5. Infectious Diseases Department; Beijing Ditan Hospital Capital Medical University; Beijing; China
6. China Field Epidemiology Training Program; Chinese Center for Disease Control and Prevention; Beijing; China
7. Development Center for Medicine and Science & Technology; National Health Commission; Beijing; China
8. Shanghai Institute of Infectious Disease and Biosecurity, Key Laboratory of Medical Molecular Virology of Ministry of Education & Ministry of Health, and Institutes of Biomedical Sciences; Medical College; Fudan University; Shanghai; China
9. State Key Laboratory of Infectious Disease Prevention and Control, National Center for AIDS/STD Control and Prevention; Chinese Center for Disease Control and Prevention Beijing; China

**Keywords:** COVID-19; epidemiology; immunology

**Word count:** 2,985     **References:** 36

## ABSTRACT

### Objective

Two COVID-19 outbreaks occurred in Henan province in early 2022 – one was a Delta variant outbreak and the other was an Omicron variant outbreak. COVID-19 vaccines used at the time of the outbreak were inactivated, 91.8%; protein subunit, 7.5%; and adenovirus5-vectored, 0.7% vaccines. The outbreaks provided an opportunity to evaluate variant-specific breakthrough infection rates and relative protective effectiveness of homologous inactivated COVID-19 vaccine booster doses against symptomatic infection and pneumonia.

### Design: Retrospective cohort study

### Methods

We evaluated relative vaccine effectiveness (rVE) with a retrospective cohort study of close contacts of infected individuals using a time-dependent Cox regression model. Demographic and epidemiologic data were obtained from the local Center for Disease Control and Prevention; clinical and laboratory data were obtained from COVID-19-designated hospitals. Vaccination histories were obtained from the national COVID-19 vaccination dataset. All data were linked by national identification number.

### Results

Among 784 SARS-CoV-2 infections, 379 (48.3%) were caused by Delta and 405 (51.7%) were caused by Omicron, with breakthrough rates of 9.9% and 17.8%, respectively. Breakthrough rates among boosted individuals were 8.1% and 4.9%. Compared with subjects who received primary vaccination series  $\geq 180$  days before infection, Cox regression modeling showed that homologous inactivated booster vaccination was statistically significantly associated with protection from symptomatic infection caused by Omicron (rVE 59%; 95% CI: 14%-80%) and pneumonia caused by Delta (rVE 62%; 95%CI: 34%-77%) and Omicron (rVE 87%; 95%CI: 3%-98%).

### Conclusions

COVID-19 vaccination in China provided good protection against symptomatic COVID-19 and COVID-19 pneumonia caused by Delta and Omicron variants. Protection declined 6 months after primary series vaccination but was restored by homologous inactivated booster doses given 6 months after the primary series.

### Strengths and limitations of this study

- The study was conducted in a simultaneous 2-variant outbreak in a single province in China and provided estimates of vaccine-built population immunity in an infection naïve population.
- The study was conducted among close contacts of people with known SARS-CoV-2 infection who were in quarantine and tested frequently for infection, ensuring accurate outcomes assessment of the exposed population.
- The study was limited by the small size of the outbreak, precluding analysis of vaccine brand-specific relative VE.
- Vaccine coverage in the outbreak setting was too high to have a comparable unvaccinated group, making absolute VE not possible to estimate accurately.
- Clinical data on comorbidities was not available, precluding analysis of rVE by comorbidity.

## INTRODUCTION

Most countries have experienced epidemic waves of COVID-19 caused by SARS-CoV-2 variants. As of December 11, 2021, five SARS-CoV-2 Variants of Concern (VOCs) have been identified, with Alpha (B.1.1.7) and Delta (B.1.617.2) predominant [1]. Omicron emerged November 2021 and rapidly replaced Delta to be the predominant global strain, accounting for 90% of GISAID SARS-CoV-2 sequences [2],[3],[4]. The World Health Organization (WHO) has listed nine COVID-19 vaccines for emergency use, including the two most commonly used vaccines in China - BBIBP-CorV and CoronaVac inactivated whole-virus vaccines. As the end of July 2022, over 3.4 billion doses of these vaccines have been used in China, and over 2 billion doses have been procured for overseas use [5],[6].

Good safety and short-term efficacy against the ancestral strain have been demonstrated for these vaccines [7], and real-world evidence on protection against VOCs and protection with booster doses is available, for example, from Guangdong, Jiangsu, and Henan [8],[9],[10],[11] in China and Chile and Brazil overseas [12],[13]. In China, the dynamic COVID-zero policy severely limits outbreak size, and very high COVID-19 primary vaccination coverage makes unvaccinated comparison groups too small and too different for conducting absolute vaccine effectiveness (VE) studies. In January 2022, two outbreaks occurred in Henan – one caused by Delta (B.1.617.2) and the other by Omicron (B.1.1.529.1) – that provided an opportunity to assess relative VE (rVE) of China-produced vaccines against COVID-19 caused by these two variants. We report results of our evaluation.

## METHODS

### Outbreak setting

The setting was Henan province where there were two simultaneous outbreaks. Henan has a population of 99.36 million people; the three involved cities were Zhengzhou (8.6 million, whole-population primary series coverage 87.2%), Yuzhou (1.2 million, 94.7%), and Anyang (1.5 million, 80.3%). The COVID-19 vaccines used were inactivated vaccines, 91.8%; ZF2001, 7.5%; and Ad5-nCoV vaccine, 0.7%. The COVID-19 prevention and control policy in the mainland of China requires that all SARS-CoV-2 infections are traced, and contacts quarantined for at least two weeks and tested periodically in quarantine. The COVID-19 vaccines used in the outbreak setting were two inactivated COVID-19 vaccines - BBIBP-CorV (Sinopharm, Beijing CNBG) and CoronaVac (Sinovac, Co., Ltd), accounting for 91.8% of vaccines used; a protein subunit vaccine, Zifivax (Zhifei Longcom, 7.5%); and an adenovirus5-vectored vaccine, Convidecia (Cansino, 0.7%). China's immunization program records all COVID-19 vaccinations in a national vaccination database indexed by national ID number. The national COVID-19 surveillance system is also indexed by national ID.

On January 2, 2022, a Yuzhou factory worker tested RT-PCR-positive in a routine pre-surgery screening. Contact tracing identified a Delta-variant community transmission chain that spread to Zhengzhou. On January 8, a medical device company employee and a middle school student both tested positive for SARS-CoV-2 infection when seeking health care in Anyang. Investigation revealed an Omicron outbreak in a boarding school with 4,103 students and teachers along with

community transmission (**Figure 1**).

### Study design and subjects

We used a retrospective cohort design to estimate rVE. Subjects were confirmed SARS-CoV-2 infections and their close contacts, grouped by vaccination status. Outcomes were infection, pneumonia, and severe illness.

A SARS-CoV-2 infection was a person with a positive RT-PCR, including asymptomatic and symptomatic infections regardless of severity; COVID-19 pneumonia was a SARS-CoV-2 infection with acute onset of fever and cough or acute onset with any three or more of the following: fever, cough, general weakness/fatigue, headache, myalgia, sore throat, coryza, dyspnea, anorexia/nausea/vomiting, diarrhea, altered mental status; or having chest CT imaging findings diagnostic of pneumonia. Severe illness was characterized by respiratory failure with need for mechanical ventilation or shock combined with other organ failure requiring ICU care[14]. Thus, the outcome definitions included subjective symptoms (e.g., sore throat and headache), elicited signs (e.g., fever, altered mental status, pneumonia on imaging), and objective health care actions (e.g., ICU admission and mechanical ventilation), with the more objective elements for the more severe outcomes.

Close contacts had exposure to confirmed SARS-CoV-2 infections up to four days before illness onset of symptomatic cases or the first RT-PCR-positive specimen for asymptomatic cases. Exposure included living in the same apartment, sharing a table for meals, studying, or working in the same room, or sharing a ward.

Subject data were obtained from the local Center for Disease Control and Prevention (CDC) and included the epidemiological investigation report, transmission chain, age, gender, date of first and last exposure, mode and location of exposure, and frequency and duration of exposure. For the confirmed SARS-CoV-2 infections, we reviewed medical records from designated COVID-19 management hospitals in Zhengzhou and Anyang to abstract clinical management data, laboratory testing and results, and chest imaging and results.

### Vaccine status

Without knowledge of whether subjects had SARS-CoV-2 infection or not, we obtained vaccination records from the national vaccination database using subjects' national IDs. Vaccination was defined as receipt of at least one dose of COVID-19 vaccine. Partial vaccination was receipt of either one dose of an inactivated COVID-19 vaccine or two doses of an inactivated vaccine with receipt of the second dose less than 14 days before exposure. Primary vaccination was completion of two doses of inactivated vaccine 14 days or more before exposure and/or a third dose of inactivated vaccine less than 7 days of exposure. Booster vaccination was a third more than 7 days before exposure. Primary vaccination was further classified as being either <180 days before exposure or  $\geq 180$  days before exposure.

### Data analysis

A breakthrough infection was an RT-PCR-confirmed SARS-CoV-2 infection at least 14 days after completion of primary vaccination. We estimated unadjusted and adjusted (gender and age group) rVE against Delta and Omicron infections using a Cox regression models. The reference group was primary vaccination  $\geq 180$  days before exposure; rVE was 1-adjusted hazard ratio (ratio

of incidences of the outcome of interest) for COVID-19 symptomatic infection or pneumonia.

Ninety-five percent of co-morbidities were among subjects 50 years and older. Our age groupings were under 18 years, 18 to 50 years, and over 50 years. Subjects in the Omicron and Delta outbreaks differed since the Omicron outbreak involved a fully vaccinated middle school with 94.7% of cases under 20 years old, with its higher force of infection. We therefore conducted rVE analyses with and without subjects under 20 years old.

We used SAS (SAS Institute Inc., Cary, NC, USA) for statistical analysis and R (version 4.1.0) for Cox survival analysis of pneumonia. P-values < 0.05 (two-tailed) were considered statistically significant.

#### **Patient and Public Involvement statement:**

This real-world, observational study was designed without patient or public involvement. COVID-19 is managed as a Level-1 infectious disease, and as such, investigations of outbreaks and public health effort to prevent illness and stop transmission are required of public health agencies. Subjects were not recruited into the study, as they were cases or close contacts managed in accordance with the National Health Commission's Protocol for Prevention and Control. Neither patients nor the public were involved in the conduct of the study, as testing and data aggregation were conducted under the prevention and control policy. Results will be disseminated through publicly-available scientific publications.

## **RESULTS**

### **Subjects**

Table 1 shows the characteristics of the subjects. Between January 2 and 23, 2022, a total of 6,521 SARS-CoV-2 infections and close contacts were identified in the three-city setting, among which 784 were SARS-CoV-2 infections and 5,737 were close contacts. Because of the 4,103-person middle school outbreak, subjects in the Anyang (Omicron) transmission chain were younger on average than in the Zhengzhou/Yuzhou (Delta) transmission chain (43.5% vs 23.8% < 20 years,  $p < 0.05$ ). Most (72.7%) subjects completed primary vaccination; 14.9% received 0-1 dose; and 12.4% received booster doses. In the Delta chain, the median number of days between primary vaccination and exposure was 117 days (IQR:40-134) among subjects completed primary <180 days before exposure and 196 days (IQR:191-203) among subjects completed primary  $\geq 180$  days before exposure. Respective medians in the Omicron chain were 133 days (IQR:121-138) and 203 days (IQR:196-210). Boosters were completed 20 (IQR:12-68) and 19 days (IQR:11-64) before Delta and Omicron exposure.

### **Breakthrough infection**

Breakthrough infection rates were 9.9% in the Delta chain and 17.8% in the Omicron chain ( $p < 0.001$ ) among subjects completing primary vaccination. By vaccination group, breakthrough rates were 10.6% (Delta) and 11.0% (Omicron) among subjects who completed primary vaccination  $\geq 180$  days ( $p > 0.05$ ); 10.1% (Delta) and 22.2% (Omicron) among subjects who completed primary vaccination <180 days ( $p < 0.001$ ); and 8.1% (Delta) and 4.9% (Omicron)



1  
2  
3 among boosted subjects ( $p>0.05$ ).  
4

5 When subjects under 20 years old were excluded, breakthrough rates were 10.8% (Delta) and  
6 10.6% (Omicron) among subjects who completed primary vaccination  $\geq 180$  days ( $p>0.05$ ); 12.3%  
7 (Delta) and 8.7% (Omicron) among subjects who completed primary vaccination  $< 180$  days  
8 ( $p>0.05$ ); and 7.9% (Delta) and 4.5% (Omicron) among boosted subjects ( $p>0.05$ ).  
9  
10  
11  
12  
13  
14  
15  
16  
17  
18  
19  
20  
21  
22  
23  
24  
25  
26  
27  
28  
29  
30  
31  
32  
33  
34  
35  
36  
37  
38  
39  
40  
41  
42  
43  
44  
45  
46  
47  
48  
49  
50  
51  
52  
53  
54  
55  
56  
57  
58  
59  
60



**Table 1.** Characteristics of SARS-CoV-2 infections and close contacts in Delta and Omicron transmission chain

| Characteristics              | Delta transmission chain             |                     |                     |                                  |         | Omicron transmission chain           |                     |                     |                                  |         |
|------------------------------|--------------------------------------|---------------------|---------------------|----------------------------------|---------|--------------------------------------|---------------------|---------------------|----------------------------------|---------|
|                              | Non/Partial<br>vaccination<br>(n, %) | Primary vaccination |                     | Booster<br>vaccination<br>(n, %) | p value | Non/Partial<br>vaccination<br>(n, %) | Primary vaccination |                     | Booster<br>vaccination<br>(n, %) | p value |
|                              |                                      | ≥180 days<br>(n, %) | <180 days<br>(n, %) |                                  |         |                                      | ≥180 days<br>(n, %) | <180 days<br>(n, %) |                                  |         |
| <b>SARS-CoV-2 infections</b> |                                      |                     |                     |                                  |         |                                      |                     |                     |                                  |         |
| Subtotal                     | 49                                   | 97                  | 182                 | 51                               |         | 12                                   | 65                  | 319                 | 9                                |         |
| Gender                       |                                      |                     |                     |                                  |         |                                      |                     |                     |                                  |         |
| Female                       | 33 (67.3)                            | 53 (54.6)           | 104 (57.1)          | 34 (66.7)                        | 0.2989  | 7 (58.3)                             | 42 (64.6)           | 176 (55.2)          | 5 (55.6)                         | 0.5767  |
| Male                         | 16 (32.7)                            | 44 (45.4)           | 78 (42.9)           | 17 (33.3)                        |         | 5 (41.7)                             | 23 (35.4)           | 143 (44.8)          | 4 (44.4)                         |         |
| Age group (yrs)              |                                      |                     |                     |                                  |         |                                      |                     |                     |                                  |         |
| < 18                         | 8 (16.3)                             | 0 (0)               | 53 (29.1)           | 0 (0)                            | <0.001  | 2 (16.7)                             | 0 (0)               | 191 (59.9)          | 0 (0)                            | <0.001  |
| 18-49                        | 19 (38.8)                            | 54 (55.7)           | 50 (27.5)           | 31 (60.8)                        |         | 7 (58.3)                             | 45 (69.2)           | 107 (33.5)          | 7 (77.8)                         |         |
| ≥ 50                         | 22 (44.9)                            | 43 (44.3)           | 79 (43.4)           | 20 (39.2)                        |         | 3 (25.0)                             | 20 (30.8)           | 21 (6.6)            | 2 (22.2)                         |         |
| <b>Close contacts</b>        |                                      |                     |                     |                                  |         |                                      |                     |                     |                                  |         |
| Subtotal                     | 525                                  | 814                 | 1619                | 575                              |         | 386                                  | 524                 | 1120                | 174                              |         |
| Gender                       |                                      |                     |                     |                                  |         |                                      |                     |                     |                                  |         |
| Female                       | 270 (51.4)                           | 430 (52.8)          | 792 (48.9)          | 307 (53.4)                       | 0.1513  | 215 (55.7)                           | 310 (59.2)          | 529 (47.2)          | 106 (60.9)                       | <0.001  |
| Male                         | 255 (48.6)                           | 384 (47.2)          | 827 (51.1)          | 268 (46.6)                       |         | 171 (44.3)                           | 214 (40.8)          | 591(52.8)           | 68 (39.1)                        |         |
| Age group (yrs)              |                                      |                     |                     |                                  |         |                                      |                     |                     |                                  |         |
| < 18                         | 149 (28.4)                           | 0 (0)               | 674 (41.6)          | 0 (0)                            | <0.001  | 100 (25.9)                           | 0 (0)               | 616 (55.0)          | 0 (0)                            | <0.001  |
| 18-49                        | 250 (47.6)                           | 598 (73.5)          | 588 (36.3)          | 421 (73.2)                       |         | 187 (48.5)                           | 366 (69.9)          | 341(30.5)           | 123 (70.7)                       |         |
| ≥ 50                         | 126 (24.0)                           | 216 (26.5)          | 357 (22.1)          | 154 (26.8)                       |         | 99 (25.6)                            | 158 (330.1)         | 163 (14.5)          | 51 (29.3)                        |         |
| Total                        | 574                                  | 911                 | 1801                | 626                              |         | 398                                  | 589                 | 1439                | 183                              |         |

### Relative Vaccine effectiveness

Table 2 shows results of the Cox regression analyses for symptomatic infection and pneumonia by Delta and Omicron variants. For both variants, univariate analysis shows that being male and booster vaccination were associated with reduced risk of symptomatic infection. Age was associated with symptomatic infection, especially among subjects  $\geq 50$  years. Cox regression adjusting for age group, gender, and vaccination status were similar in magnitude for symptomatic infection risk from Delta vs Omicron. Hazard ratios among those  $\geq 50$  years differed in direction between Delta and Omicron (2.75 and 0.56), and relative protection increased from 24% to 59% in boosted subjects. After removing subjects  $< 20$  years (primarily the school outbreak students) from the Cox regression analysis, primary vaccination  $< 180$  days and booster vaccination were both associated with protection from Delta and Omicron symptomatic infections.

For pneumonia, the relation with age was more pronounced than was the case for symptomatic infection, and more so with Delta than Omicron. Hazard ratios for pneumonia were consistent in direction, showing greater protection associated with primary vaccination  $< 180$  days and booster dose administration, regardless of variant. After excluding subjects  $< 20$  years from the Cox regression analysis, hazard ratios against pneumonia change little, except for an increase in protection (from 17% to 35%) among subjects who received primary vaccination within 180 days. Survival curve analysis results for pneumonia for each variant by vaccination status group are shown in Figure 2. Although the three vaccination groups were statistically significantly different for Delta pneumonia, there was no statistically significant difference between the two primary vaccination groups for Omicron pneumonia, although both were different from the boosted group.

There were few severe infections in the two transmission chains. There were 12 severe cases in the Delta chain, with five included in Cox analysis (2 with primary vaccination  $\geq 180$  days group, 3 cases with primary vaccination  $< 180$  days, and none in the booster vaccination group. There were no severe cases in the Omicron transmission chain.

**Table 2.** Cox regression analysis by vaccination status and by outcomes of SARS-CoV-2 infection

| Covariates                          | Delta infection for all |         |                        |         | Omicron infection for all |               |                        |         | Omicron infection for $\geq 20$ yrs |         |
|-------------------------------------|-------------------------|---------|------------------------|---------|---------------------------|---------------|------------------------|---------|-------------------------------------|---------|
|                                     | Crude HR<br>(95%CI)     | p value | Adjusted HR<br>(95%CI) | p value | Crude<br>(95%CI)          | HR<br>p value | Adjusted HR<br>(95%CI) | p value | Adjusted HR<br>(95%CI)              | p value |
| <b>Symptomatic infection</b>        |                         |         |                        |         |                           |               |                        |         |                                     |         |
| Gender                              |                         |         |                        |         |                           |               |                        |         |                                     |         |
| Female                              | Ref                     |         | Ref                    |         | Ref                       |               | Ref                    |         | Ref                                 |         |
| Male                                | 0.80 (0.64 - 1.00)      | 0.05    | 0.79 (0.63 - 0.98)     | 0.04    | 0.80 (0.65 - 0.99)        | 0.04          | 0.73 (0.59 - 0.90)     | 0.01    | 0.52(0.33 - 0.80)                   | 0.003   |
| Age group(age)                      |                         |         |                        |         |                           |               |                        |         |                                     |         |
| < 18                                | Ref                     |         | Ref                    |         | Ref                       |               | Ref                    |         |                                     |         |
| 18-49                               | 1.17 (0.84 - 1.63)      | 0.36    | 1.26 (0.87 - 1.81)     | 0.22    | 0.65 (0.52 - 0.81)        | <0.01         | 0.92(0.72 - 1.18)      | 0.5     | Ref (20-49 yrs)                     |         |
| $\geq 50$                           | 2.58 (1.86 - 3.60)      | <0.01   | 2.75 (1.94 - 3.91)     | <0.01   | 0.40 (0.28 - 0.56)        | <0.01         | 0.56 (0.39 - 0.81)     | 0.01    | 1.33(0.89 - 2.00)                   | 0.166   |
| Vaccination status                  |                         |         |                        |         |                           |               |                        |         |                                     |         |
| Primary vaccination $\geq 180$ days | Ref                     |         | Ref                    |         | Ref                       |               | Ref                    |         | Ref                                 |         |
| Primary vaccination<180 days        | 0.92 (0.72 - 1.18)      | 0.51    | 1.04 (0.79 - 1.36)     | 0.79    | 2.11 (1.60 - 2.78)        | <0.01         | 1.95 (1.43 - 2.65)     | <0.01   | 0.79(0.52 - 1.20)                   | 0.261   |
| Booster vaccination                 | 0.75 (0.53 - 1.06)      | 0.11    | 0.76 (0.54 - 1.07)     | 0.11    | 0.41 (0.20 - 0.87)        | 0.02          | 0.41(0.20 - 0.86)      | 0.02    | 0.39(0.18 - 0.86)                   | 0.019   |
| <b>Pneumonia</b>                    |                         |         |                        |         |                           |               |                        |         |                                     |         |
| Gender                              |                         |         |                        |         |                           |               |                        |         |                                     |         |
| Female                              | Ref                     |         | Ref                    |         | Ref                       |               | Ref                    |         | Ref                                 |         |
| Male                                | 0.65 (0.47 - 0.90)      | 0.01    | 0.65 (0.47 - 0.90)     | 0.01    | 0.96 (0.60 - 1.52)        | 0.85          | 0.93 (0.58 - 1.49)     | 0.77    | 0.77(0.39 - 1.54)                   | 0.457   |
| Age group (yrs)                     |                         |         |                        |         |                           |               |                        |         |                                     |         |
| < 18                                | Ref                     |         | Ref                    |         | Ref                       |               | Ref                    |         |                                     |         |
| 18-49                               | 8.61 (2.70 - 27.43)     | <0.01   | 9.11 (2.81 - 29.5)     | <0.01   | 0.88 (0.52 - 1.50)        | 0.63          | 0.89 (0.48 - 1.67)     | 0.73    | Ref (20-49 yrs)                     |         |
| $\geq 50$                           | 28.00 (8.88 - 88.40)    | <0.01   | 29.50 (9.26 - 94.0)    | <0.01   | 1.11 (0.59 - 2.07)        | 0.75          | 1.13 (0.56 - 2.27)     | 0.74    | 1.70(0.87 - 3.32)                   | 0.123   |
| Vaccination status                  |                         |         |                        |         |                           |               |                        |         |                                     |         |
| Primary vaccination $\geq 180$ days | Ref                     |         | Ref                    |         | Ref                       |               | Ref                    |         | Ref                                 |         |
| Primary vaccination<180 days        | 0.60 (0.43 - 0.83)      | 0.01    | 0.86 (0.61 - 1.20)     | 0.37    | 0.84 (0.51 - 1.37)        | 0.48          | 0.83 (0.46 - 1.50)     | 0.53    | 0.65(0.32 - 1.32)                   | 0.231   |
| Booster vaccination                 | 0.38 (0.22 - 0.64)      | <0.01   | 0.38 (0.23 - 0.66)     | <0.01   | 0.13 (0.02 - 0.97)        | 0.047         | 0.13 (0.02 - 0.97)     | 0.047   | 0.15(0.02 - 1.08)                   | 0.059   |

## DISCUSSION

We used a 748-case, two-variant COVID-19 outbreak in Henan province to determine the relative vaccine effectiveness of the vaccines used in China to protect against symptomatic infection and pneumonia. Our study found an rVE of 62% against Delta pneumonia and 87% against Omicron pneumonia among homologous inactivated vaccine booster-dose recipients compared with individuals who received complete primary vaccination greater than 180 days prior to exposure to SARS-CoV-2. Relative VE was lower for individuals receiving primary vaccination less than 180 days prior to exposure than among boosted individuals, demonstrating an effectiveness advantage of the homologous booster dose. Results from our study support the current COVID-19 booster vaccination strategy in China in which everyone 18 years and older is recommended to receive a booster dose six months after their primary series.

Our study also found a higher breakthrough infection rate in the Omicron transmission chain than the Delta chain (22% vs 10%) and found no severe Omicron cases and only 12 severe Delta cases, representing 3% of the Delta outbreak cases. The low rate of severe infection provides information valuable for projection of health care resource needs in the future.

In licensure clinical trials for vaccines produced in China estimates of efficacy against symptomatic COVID-19 were 50% to 78% [15],[16]. Our relative VE estimates are not directly comparable, since efficacy estimates are absolute rather than relative estimates. A relative VE estimate only indicates additional VE above and beyond an unmeasured absolute VE of the comparison group. There have been several real-world assessments of VE of the China-produced vaccines [8],[9],[10],[11], but none that compare rVE against Delta and Omicron in simultaneous outbreaks, and few studies of relative VE from a booster dose of China-produced vaccine.

As of September 7, 2022, 603 million confirmed cases of COVID-19 and 6.4 million COVID-19 deaths were reported worldwide to the World Health Organization (WHO) [[17]. To stop the virus from raging around the world, vaccines had high hopes. In less than a year after SARS-CoV-2 emergence, COVID-19 vaccines were developed via several technologies [18] and have been approved by regulators and WHO for emergency use. WHO approved the two inactivated vaccines that comprised the vast majority of COVID-19 vaccines used in China and included in our study.

In the real world, several studies reported high effectiveness of mRNA-based vaccines against SARS-CoV-2 infection, with a breakthrough infection of less than 1% of symptomatic SARS-CoV-2 infections, and a ~0.1% rate of hospitalization or death[19],[20]. However, rapid decrease of neutralizing antibody levels in the first 3-month after the second dose was observed [21], accompanied by the significant decline of protection six month after completion of two-dose regimen [22],[23]. However, a third dose could significantly restore protection, especially protection against severe COVID-19-related outcomes. In large observational studies conducted in Israel, compared with two doses regimen completed at least 5 months previously, adding a third dose was estimated to be > 90% effective in preventing severe outcomes of SARS-CoV-2 infections [24],[25]. Also in Israel, among residents of long-term care facilities, a relative reduction of 71% and 80% on preventing SARS-CoV-2 infection and hospitalization were observed after receiving third doses [26]. In China, inactivated vaccines were implemented widely, and a similar decline of neutralizing titers was also observed. Immunogenicity of homologous booster doses of inactivated vaccine has been illustrated in clinical trials [7], [27],

1  
2  
3 and the likely mechanism for booster dose immunogenicity and corresponding effectiveness is  
4 activation of memory B cells induced by primary series vaccination. However, due to high  
5 primary-series COVID-19 vaccine coverage in China, it is challenging to measure absolute  
6 vaccine effectiveness because measuring absolute VE requires an unvaccinated comparison group.  
7 This challenge is greater for estimating absolute VE against the Omicron variant since the  
8 Omicron infections were more recent than the ancestral and Delta variant infections.  
9

10  
11 The number of studies of COVID-19 VE against Omicron is growing. VEs of mRNA vaccines  
12 and adenovirus vector vaccines against Omicron were significantly lower than against Delta. At  
13 the end of 2021, a real world study on VE against Omicron pneumonia in South Africa showed  
14 that VE of Pfizer mRNA vaccine was 70% [2]. VE against infection was limited and VE against  
15 hospitalization decreased significantly with time since vaccination (82% within 14 days, 52%  
16 between 15 and 179 days, and 38% over 180 days). However, after a homologous booster dose,  
17 VE against hospitalization caused by Delta and Omicron increased to 94% and 90%. Although our  
18 study measured relative VE, the booster dose impact appears consistent, showing that booster  
19 vaccination improves protective effectiveness of the vaccines [3],[28].  
20  
21

22  
23 We found a higher breakthrough infection rate for Omicron than Delta exposure. A likely  
24 explanation is that most Omicron transmission was in a large boarding middle school. The  
25 crowded student dormitories, classrooms, and canteens may greatly increase pathogen exposure,  
26 leading to reduced protection [29]. After receiving boosters, we observed significantly lower  
27 breakthrough rates for Delta (22% vs 8%) and Omicron exposure (10% vs 5%). Immunity elicited  
28 by COVID-19 vaccines wanes over time [30], and giving booster doses is necessary for  
29 restoration [4],[31],[32].  
30  
31

32 Consistent with what is well known about COVID-19, older age was risk factor for pneumonia  
33 in our study. The hazard ratio among people over 50 years old was higher than in people under 18  
34 years old for Delta pneumonia. Hypo-responsiveness among the elderly has been reported from  
35 clinical studies of COVID-19 vaccines [19],[33],[34]. Due to immunosenescence, elderly have a  
36 lower ability to fight respiratory infections and are hyporesponsive to vaccination [35],[36].  
37  
38

39 There are several limitations in our study. First, the age distributions in the Delta and Omicron  
40 transmission chains were different. Delta transmission occurred in a community, while Omicron  
41 transmission was concentrated in a middle school. The imbalance in age did not appear to  
42 influence the relative VE of booster doses against Delta and Omicron in age-based sensitivity  
43 analysis. Second, we did not have data on comorbidities of most subjects. We therefore could not  
44 use comorbidities in the Cox regression model. Comorbidity data were available in a small  
45 subgroup, however, and these data indicated that more than 80% of comorbidity occurred in  
46 people  $\geq 50$  years. We therefore used 50 years of age as a cut-off for age group aggregation.  
47 Third, because coverage was very high at 90%, there were too few unvaccinated people to serve as  
48 control to measure absolute vaccine effectiveness. The small number of unvaccinated individuals  
49 are likely to be significantly different than vaccinated people, making them an unreliable control  
50 group. We therefore excluded subjects who did not complete primary vaccination, and instead  
51 used the numerous subjects who completed the primary vaccination  $\geq 180$  days as reference to  
52 measure the relative VE throughout the analysis. Finally, the outbreak was too small and the  
53 subjects too few to assess rVE for the different vaccines. Since almost all of the vaccine used in  
54 Henan (and China) are the two inactivated vaccines in our study, we believe it is reasonable to  
55 conclude that we assessed rVE for China's inactivated vaccines, especially the homologous  
56  
57  
58  
59  
60

1  
2  
3 booster dose, and that our results can generalize to the rest of mainland China. However, our study  
4 results cannot generalize to other countries.  
5

## 6 **Conclusion**

7  
8 COVID-19 vaccination in China provided good protection against symptomatic COVID-19  
9 and COVID-19 pneumonia caused by Delta and Omicron variants. Protection declined 6 months  
10 after primary series vaccination but was restored by homologous inactivated booster doses given 6  
11 months after the primary series.  
12  
13  
14  
15  
16  
17  
18  
19  
20  
21  
22  
23  
24  
25  
26  
27  
28  
29  
30  
31  
32  
33  
34  
35  
36  
37  
38  
39  
40  
41  
42  
43  
44  
45  
46  
47  
48  
49  
50  
51  
52  
53  
54  
55  
56  
57  
58  
59  
60

## Acknowledgements

We are very grateful for the data collection efforts by local CDC and infectious hospital staff of Zhengzhou, Yuzhou, and Anyang cities in Henan province. We are very grateful to Yaowen Zhang, Yang Liu (Beijing Institute of Biological Products CO., LTD, SINOPHARM), and Xiaobin Cao and Yupeng Liang (Sinovac Research & Development Co., Ltd) for help with data extraction and running SAS code for data analysis.

## Contributors

ZDY, ZYW, XYW, XYL and YMS acquired funding and contributed to the study's conception and design. ABW, RZ, ZHQ, FZW, CH, ZJA, HFW, and YY conceptualized the study and prepared the original study protocol, which was subsequently reviewed by LER. DW, LT, and CH developed the statistical methods. DW, CH and XYW wrote and tested the SAS code for the data analysis and drafted the manuscript. YY, HFW, YYZ, JJP, YFL, MXL, CSW and YTM collected data from local CDCs and abstracted the data. DW, LT, LER ZJA, ZDY and YMS interpreted the results and revised the manuscript and critically reviewed the manuscript. All authors approved the final submitted version.

## Funding

This work was supported by the Operation of Public Health Emergency Response Mechanism of Chinese Center for Disease Control and Prevention (131031001000150001) and the National Key Research and Development Program of China(2021YFC2301600).

## Competing interests

All authors declare no competing interests.

## Ethical approval

COVID-19 is a class A notifiable infectious disease according to the Law on the Prevention and Control of Infectious Diseases (SCSNPC, 1989) in China; case reporting and investigation are mandatory. This study used data from COVID-19 surveillance and control and COVID-19 vaccination records available to public health officials; individual informed consent is not required or possible for routine surveillance data collection for a class A notifiable infectious disease. This study was approved by the Institutional Review Board of Chinese Center for Disease Control and Prevention (Approval Notice:202101-01).

## Data sharing

The data can be assessed from the China Information System for Disease Control and Prevention by researchers who meet the criteria for access to confidential data (for the criteria for access and details of how to request access see <https://www.phsciencedata.cn/Share/en/index.jsp>).



## References

1. World Health Organization. Weekly epidemiological update on COVID-19 - 22 February 2022. 2022; 80.
2. Collie S, Champion J, Moultrie H, et al. Effectiveness of BNT162b2 Vaccine against Omicron Variant in South Africa. *The New England journal of medicine* 2022;386(5):494-96. doi: 10.1056/NEJMc2119270
3. Hansen CH, Schelde AB, Moustsen-Helm IR, et al. Vaccine effectiveness against SARS-CoV-2 infection with the Omicron or Delta variants following a two-dose or booster BNT162b2 or mRNA-1273 vaccination series: A Danish cohort study. *medRxiv* 2021:2021.12.20.21267966. doi: 10.1101/2021.12.20.21267966
4. Thompson MG, Natarajan K, Irving SA, et al. Effectiveness of a Third Dose of mRNA Vaccines Against COVID-19-Associated Emergency Department and Urgent Care Encounters and Hospitalizations Among Adults During Periods of Delta and Omicron Variant Predominance - VISION Network, 10 States, August 2021-January 2022. *MMWR Morb Mortal Wkly Rep* 2022;71(4):139-45. doi: 10.15585/mmwr.mm7104e3 [published Online First: 2022/01/28]
5. Immunisation TGAfVa. COVAX Global Supply Forecast. 2021. <https://www.gavi.org/sites/default/files/covid/covax/COVAX-Supply-Forecast.pdf>.
6. World Health Organization. Covid-19 Vaccines [Available from: <https://www.who.int/teams/regulation-prequalification/eul/covid-19>].
7. Zeng G, Wu Q, Pan H, et al. Immunogenicity and safety of a third dose of CoronaVac, and immune persistence of a two-dose schedule, in healthy adults: interim results from two single-centre, double-blind, randomised, placebo-controlled phase 2 clinical trials. *Lancet Infect Dis* 2021 doi: 10.1016/s1473-3099(21)00681-2 [published Online First: 20211207]
8. Hu Z, Tao B, Li Z, et al. Effectiveness of inactivated COVID-19 vaccines against severe illness in B.1.617.2 (Delta) variant-infected patients in Jiangsu, China. *Int J Infect Dis* 2022;116:204-09. doi: 10.1016/j.ijid.2022.01.030 [published Online First: 20220119]
9. Dan Wu YZ, Lin Tang, Fuzhen Wang, Ying Ye, Chao Ma, Hui Zheng, Wenzhou Yu, Lei Cao, Yifan Song, Abuduwaili Reyimu, Xiaoxiao Zhang, Haifeng Wang, Yifei Nie, Mingxia Lu, Muge Qi, Jun Li, Ruolin Wang, Kaichao Yang, Changshuang Wang, Lawrence Everett Rodewald, Geroge Fu Gao, Zhijie An, Zundong Yin. Effectiveness of Inactivated COVID-19 Vaccines Against Symptomatic, Pneumonia, and Severe Disease Caused by the Delta Variant: Real World Study and Evidence — China, 2021. *China CDC Wkly* 2022;4(4):57-65.
10. Kang M, Yi Y, Li Y, et al. Effectiveness of Inactivated COVID-19 Vaccines Against Illness Caused by the B.1.617.2 (Delta) Variant During an Outbreak in Guangdong, China : A Cohort Study. *Annals of internal medicine* 2022 doi: 10.7326/m21-3509 [published Online First: 2022/02/01]
11. Li XN, Huang Y, Wang W, et al. Effectiveness of inactivated SARS-CoV-2 vaccines against the Delta variant infection in Guangzhou: a test-negative case-control real-world study. *Emerg Microbes Infect* 2021;10(1):1751-59. doi: 10.1080/22221751.2021.1969291 [published Online First: 2021/08/17]
12. Jara A, Undurraga EA, Gonzalez C, et al. Effectiveness of an Inactivated SARS-CoV-2 Vaccine in Chile. *The New England journal of medicine* 2021;385(10):875-84. doi: 10.1056/NEJMoa2107715 [published Online First: 2021/07/08]
13. Hitchings MDT, Ranzani OT, Torres MSS, et al. Effectiveness of CoronaVac among healthcare workers in the setting of high SARS-CoV-2 Gamma variant transmission in Manaus, Brazil: A test-negative case-control study. *Lancet Reg Health Am* 2021;1:100025. doi: 10.1016/j.lana.2021.100025 [published Online First: 2021/08/14]
14. TGOoNHCNT. A. Diagnosis and Treatment Protocol for COVID-19 Patients (Tentative 8th Edition). *Infectious Diseases & Immunity* 2021;1(1):8-16.
15. Al Kaabi N, Zhang Y, Xia S, et al. Effect of 2 Inactivated SARS-CoV-2 Vaccines on Symptomatic COVID-19 Infection in Adults: A Randomized Clinical Trial. *Jama* 2021;326(1):35-45. doi: 10.1001/jama.2021.8565



[published Online First: 2021/05/27]

16. Palacios RaB, Ana Paula and Albuquerque, Camila Santos Nascimento and Patiño, Elizabeth González and Santos, Joane do Prado and Tilli Reis Pessoa Conde, Mônica and Piorelli, Roberta de Oliveira and Pereira Júnior, Luiz Carlos and Raboni, Sonia Mara and Ramos, Fabiano and Sierra Romero, Gustavo Adolfo and Leal, Fábio Eudes and Camargo, Luis Fernando Aranha and Aoki, Francisco Hideo and Coelho, Eduardo Barbosa and Oliveira, Danise Senna and Fontes, Cor Jesus Fernandes and Pileggi, Gecilmara Cristina Salviato and Oliveira, Ana Lúcia Lyrio de and Siqueira, André Machado de and Oliveira, Danielle Bruna Leal de and Botosso, Viviane Fongaro and Zeng, Gang and Xin, Qianqian and Teixeira, Mauro Martins and Nogueira, Maurício Lacerda and Kallas, Esper Georges,. Efficacy and Safety of a COVID-19 Inactivated Vaccine in Healthcare Professionals in Brazil: The PROFISCOV Study. <https://ssrn.com/abstract=3822780>.

17. Organization WH. WHO Coronavirus (COVID-19) Dashboard 2022 [Available from: <https://covid19.who.int/> accessed March 2 2022.

18. Krammer F. SARS-CoV-2 vaccines in development. *Nature* 2020;586(7830):516-27. doi: 10.1038/s41586-020-2798-3 [published Online First: 2020/09/24]

19. Polack FP, Thomas SJ, Kitchin N, et al. Safety and Efficacy of the BNT162b2 mRNA Covid-19 Vaccine. *The New England journal of medicine* 2020;383(27):2603-15. doi: 10.1056/NEJMoa2034577 [published Online First: 2020/12/11]

20. Haas EJ, Angulo FJ, McLaughlin JM, et al. Impact and effectiveness of mRNA BNT162b2 vaccine against SARS-CoV-2 infections and COVID-19 cases, hospitalisations, and deaths following a nationwide vaccination campaign in Israel: an observational study using national surveillance data. *Lancet* 2021;397(10287):1819-29. doi: 10.1016/s0140-6736(21)00947-8 [published Online First: 2021/05/09]

21. Levin EG, Lustig Y, Cohen C, et al. Waning Immune Humoral Response to BNT162b2 Covid-19 Vaccine over 6 Months. *The New England journal of medicine* 2021;385(24):e84. doi: 10.1056/NEJMoa2114583 [published Online First: 2021/10/07]

22. Goldberg Y, Mandel M, Bar-On YM, et al. Waning Immunity after the BNT162b2 Vaccine in Israel. *The New England journal of medicine* 2021;385(24):e85. doi: 10.1056/NEJMoa2114228 [published Online First: 2021/10/28]

23. Chemaitelly H, Tang P, Hasan MR, et al. Waning of BNT162b2 Vaccine Protection against SARS-CoV-2 Infection in Qatar. *The New England journal of medicine* 2021;385(24):e83. doi: 10.1056/NEJMoa2114114 [published Online First: 2021/10/07]

24. Barda N, Dagan N, Cohen C, et al. Effectiveness of a third dose of the BNT162b2 mRNA COVID-19 vaccine for preventing severe outcomes in Israel: an observational study. *Lancet* 2021;398(10316):2093-100. doi: 10.1016/s0140-6736(21)02249-2 [published Online First: 2021/11/11]

25. Arbel R, Hammerman A, Sergienko R, et al. BNT162b2 Vaccine Booster and Mortality Due to Covid-19. *The New England journal of medicine* 2021;385(26):2413-20. doi: 10.1056/NEJMoa2115624 [published Online First: 2021/12/09]

26. Muhsen K, Maimon N, Mizrahi A, et al. Effects of BNT162b2 Covid-19 Vaccine Booster in Long-Term Care Facilities in Israel. *The New England journal of medicine* 2022;386(4):399-401. doi: 10.1056/NEJMc2117385 [published Online First: 2021/12/23]

27. Zhang Y, Yang Y, Qiao N, et al. Early assessment of the safety and immunogenicity of a third dose (booster) of COVID-19 immunization in Chinese adults. *Frontiers of medicine* 2022:1-9. doi: 10.1007/s11684-021-0914-x [published Online First: 2022/02/06]

28. Tang P, Hasan MR, Chemaitelly H, et al. BNT162b2 and mRNA-1273 COVID-19 vaccine effectiveness against the SARS-CoV-2 Delta variant in Qatar. *Nat Med* 2021;27(12):2136-43. doi: 10.1038/s41591-021-01583-4 [published Online First: 2021/11/04]

- 1  
2  
3  
4  
5  
6  
7  
8  
9  
10  
11  
12  
13  
14  
15  
16  
17  
18  
19  
20  
21  
22  
23  
24  
25  
26  
27  
28  
29  
30  
31
29. Langwig KE, Gomes MGM, Clark MD, et al. Limited available evidence supports theoretical predictions of reduced vaccine efficacy at higher exposure dose. *Scientific reports* 2019;9(1):3203. doi: 10.1038/s41598-019-39698-x [published Online First: 2019/03/03]
30. GeurtsvanKessel CH, Geers D, Schmitz KS, et al. Divergent SARS CoV-2 Omicron-reactive T- and B cell responses in COVID-19 vaccine recipients. *Science immunology* 2022:eabo2202. doi: 10.1126/sciimmunol.abo2202 [published Online First: 2022/02/04]
31. Gupta RK, Topol EJ. COVID-19 vaccine breakthrough infections. *Science* 2021;374(6575):1561-62. doi: 10.1126/science.abl8487 [published Online First: 2021/12/24]
32. Petersen M, Schwab J, Havlir DV. SARS-CoV-2 vaccine boosters: The time to act is now. *PLoS medicine* 2021;18(12):e1003882. doi: 10.1371/journal.pmed.1003882 [published Online First: 2021/12/10]
33. Baden LR, El Sahly HM, Essink B, et al. Efficacy and Safety of the mRNA-1273 SARS-CoV-2 Vaccine. *The New England journal of medicine* 2021;384(5):403-16. doi: 10.1056/NEJMoa2035389 [published Online First: 2020/12/31]
34. Andrews N, Tessier E, Stowe J, et al. Duration of Protection against Mild and Severe Disease by Covid-19 Vaccines. *The New England journal of medicine* 2022;386(4):340-50. doi: 10.1056/NEJMoa2115481 [published Online First: 2022/01/13]
35. Crooke SN, Ovsyannikova IG, Poland GA, et al. Immunosenescence and human vaccine immune responses. *Immunity & ageing : I & A* 2019;16:25. doi: 10.1186/s12979-019-0164-9 [published Online First: 2019/09/19]
36. Oh SJ, Lee JK, Shin OS. Aging and the Immune System: the Impact of Immunosenescence on Viral Infection, Immunity and Vaccine Immunogenicity. *Immune network* 2019;19(6):e37. doi: 10.4110/in.2019.19.e37 [published Online First: 2020/01/11]

## Figure titles and legends

### Figure 1.

Title: Epidemic curves of SARS-CoV-2 infections in Zhengzhou/Yuzhou and Anyang between December 26, 2021 and January 23, 2022.

Legend: Figure 1a shows the COVID-19 epidemic curve with the number of cases plotted by date of symptom onset from December 26, 2021 to January 16, 2022 in the Delta transmission chain. Confirmed and asymptomatic cases are stacked to show total daily cases by date of symptom onset. The peak onset of symptomatic infection occurred between January 5 and 10., 2022. Figure 1b shows the COVID-19 epidemic curve for confirmed cases only, with number of cases plotted by date of symptom onset of from January 04, 2022 to January 23,2022 in the Omicron transmission chain. The confirmed cases onset of illness peaked between January 9 and 16.

### Figure 2.

Title: Survival curves of pneumonia caused by Delta and Omicron variants.

Legend: Figures 2a and 2b show Cox model estimates of the survival probability of pneumonia with the Delta and Omicron variant of SARS-CoV-2 according to vaccination status, adjusting gender and age, starting from December 15, 2021. Time zero is two weeks before the first case.

1  
2  
3  
4  
5  
6  
7  
8  
9  
10  
11  
12  
13  
14  
15  
16  
17  
18  
19  
20  
21  
22  
23  
24  
25  
26  
27  
28  
29  
30  
31  
32  
33  
34  
35

1a.Zhengzhou/Yuzhou

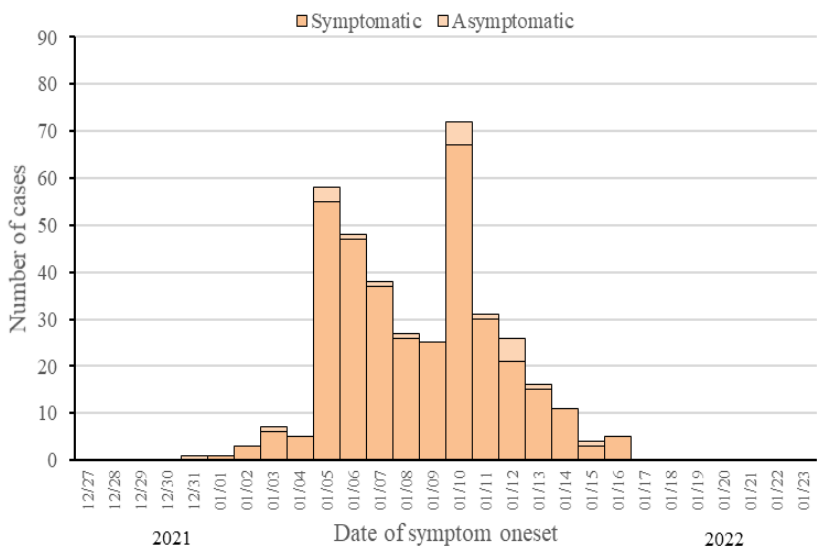

1b.Anyang

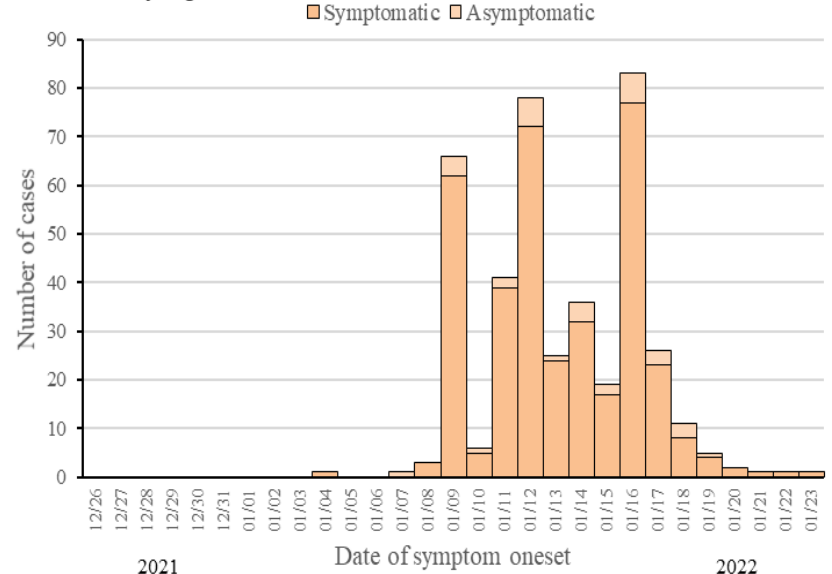

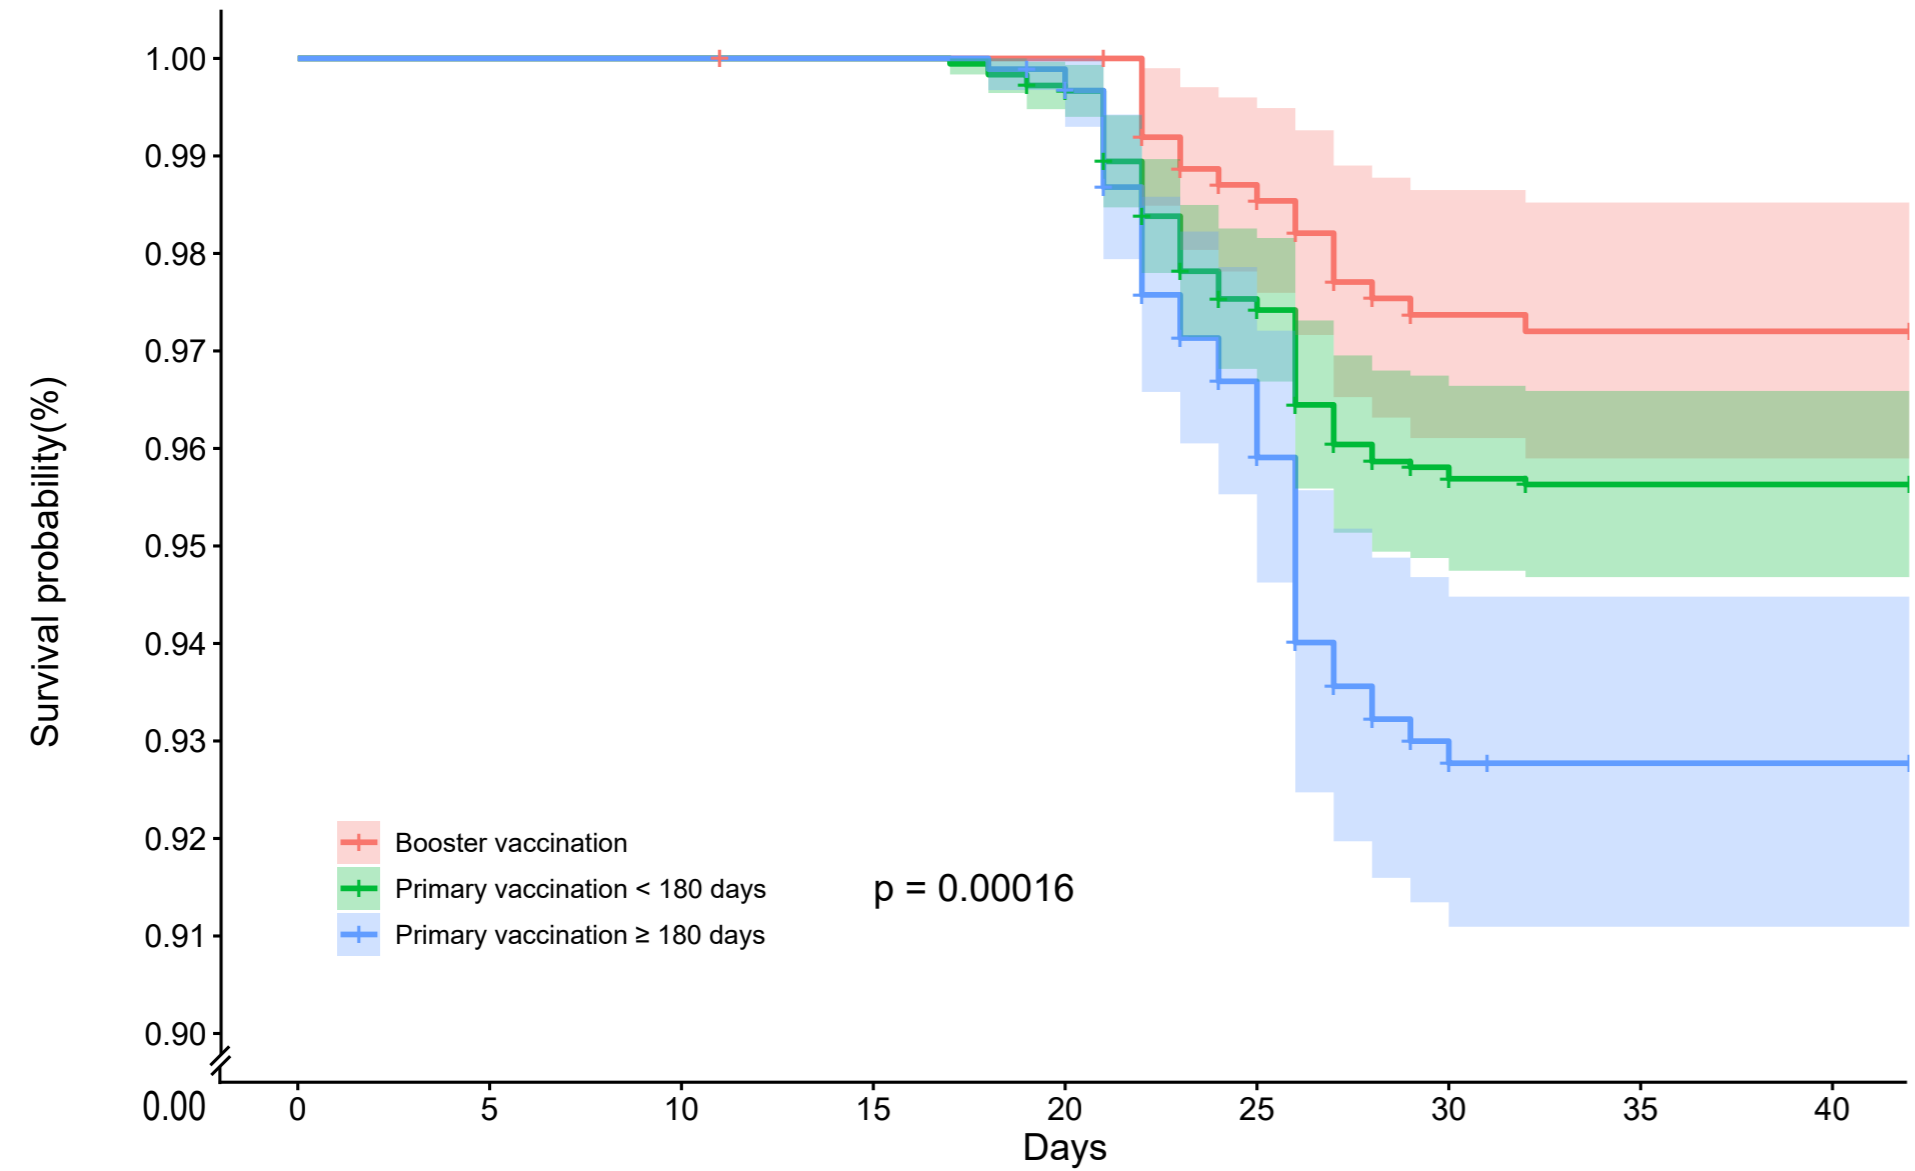

Number at risk

|                                |      |      |      |      |      |      |      |      |      |
|--------------------------------|------|------|------|------|------|------|------|------|------|
| Booster vaccination            | 626  | 626  | 626  | 625  | 625  | 601  | 576  | 575  | 575  |
| Primary vaccination < 180 days | 1801 | 1801 | 1801 | 1801 | 1794 | 1711 | 1628 | 1619 | 1619 |
| Primary vaccination ≥ 180 days | 911  | 911  | 911  | 911  | 909  | 867  | 822  | 814  | 814  |

2a. Delta

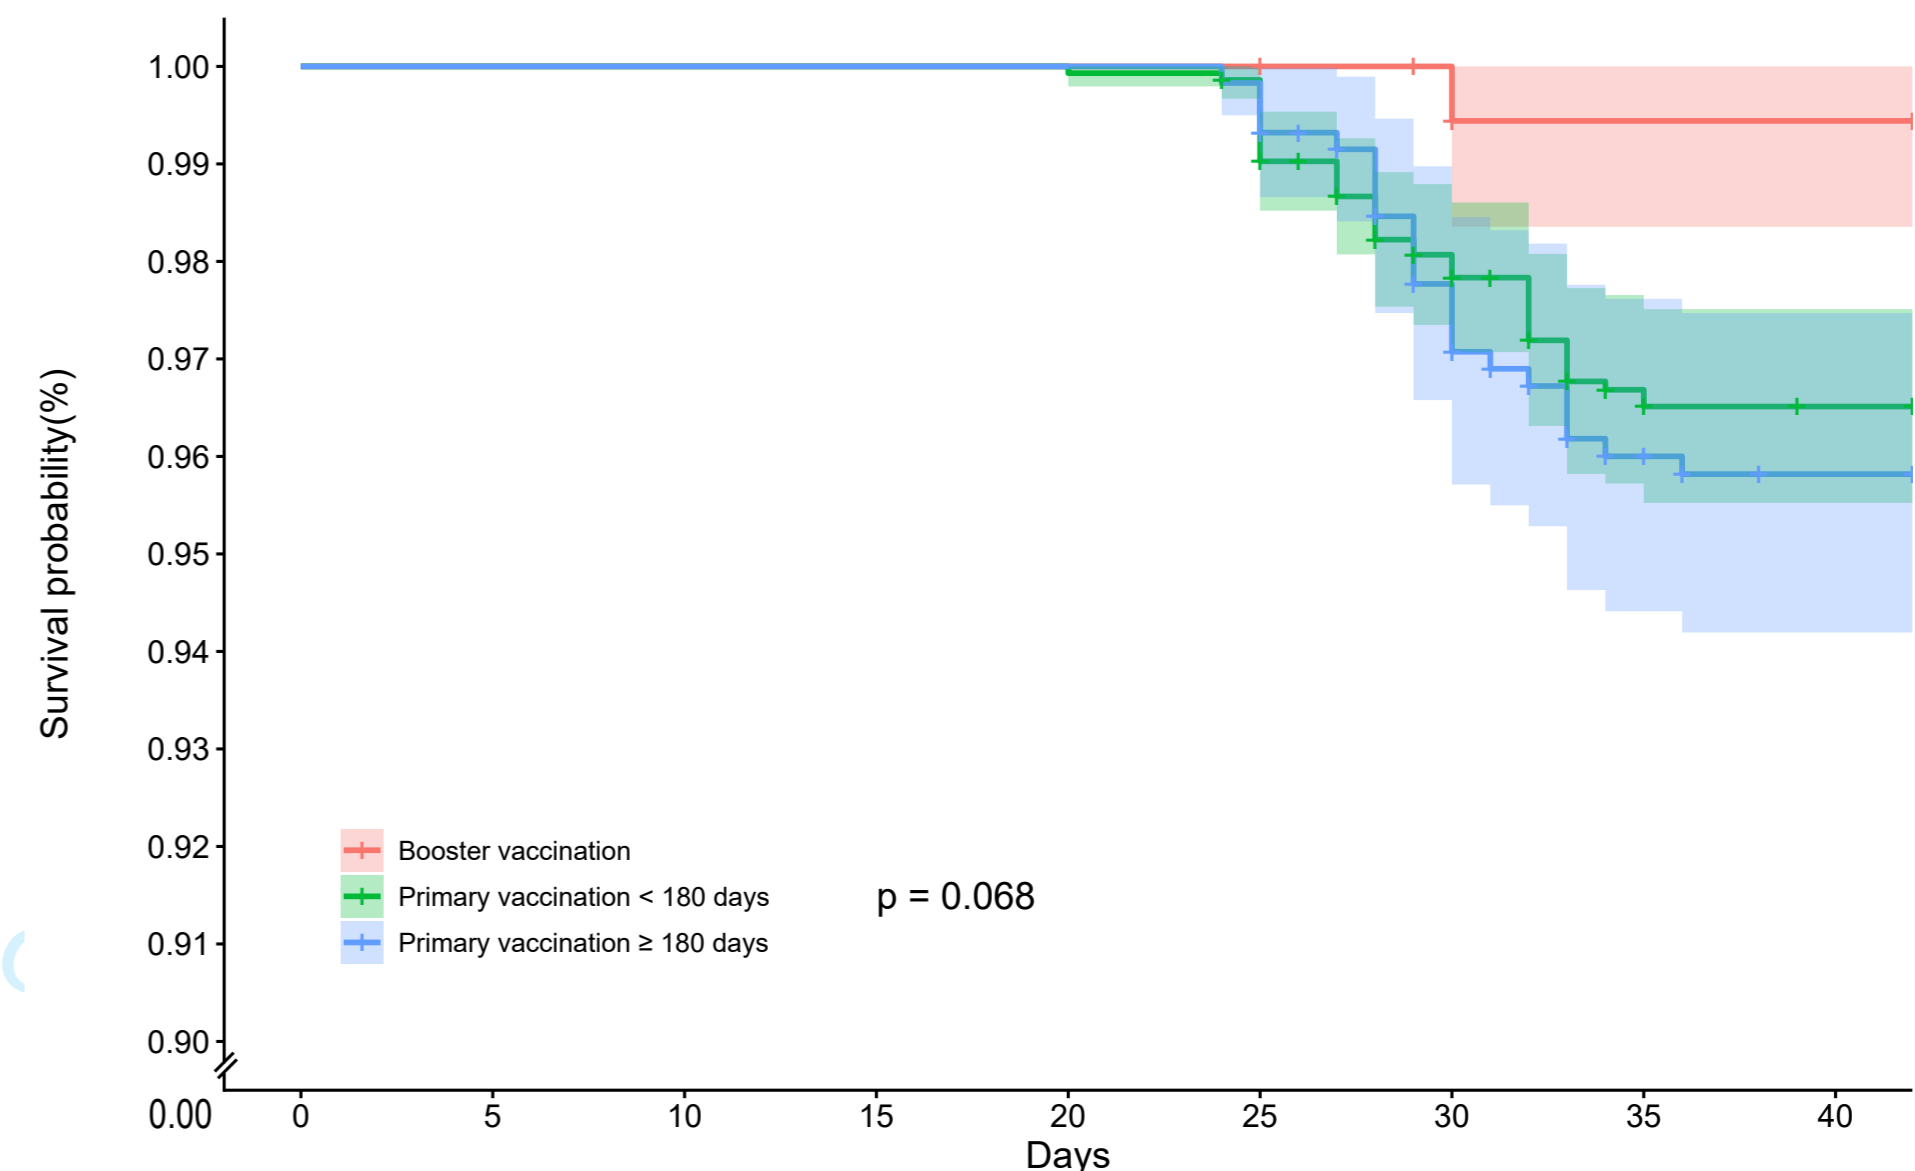

Number at risk

|                                |      |      |      |      |      |      |      |      |      |
|--------------------------------|------|------|------|------|------|------|------|------|------|
| Booster vaccination            | 183  | 183  | 183  | 183  | 183  | 183  | 179  | 174  | 174  |
| Primary vaccination < 180 days | 1439 | 1439 | 1439 | 1439 | 1439 | 1436 | 1253 | 1124 | 1120 |
| Primary vaccination ≥ 180 days | 589  | 589  | 589  | 589  | 589  | 588  | 562  | 529  | 524  |

2b. Omicron

1  
2  
3  
4  
5  
6  
7  
8  
9  
10  
11  
12  
13  
14  
15  
16  
17  
18  
19  
20  
21  
22  
23  
24  
25  
26  
27  
28  
29  
30  
31  
32  
33  
34  
35  
36  
37  
38  
39  
40  
41  
42  
43  
44  
45  
46  
47  
48  
49  
50  
51  
52  
53  
54  
55  
56

**STROBE 2007 (v4) Statement—Checklist of items that should be included in reports of cohort studies**

| Section/Topic             | Item # | Recommendation                                                                                                                                                                       | Reported on page # |
|---------------------------|--------|--------------------------------------------------------------------------------------------------------------------------------------------------------------------------------------|--------------------|
| <b>Title and abstract</b> | 1      | (a) Indicate the study’s design with a commonly used term in the title or the abstract                                                                                               | 1                  |
|                           |        | (b) Provide in the abstract an informative and balanced summary of what was done and what was found                                                                                  | 2                  |
| <b>Introduction</b>       |        |                                                                                                                                                                                      |                    |
| Background/rationale      | 2      | Explain the scientific background and rationale for the investigation being reported                                                                                                 | 3                  |
| Objectives                | 3      | State specific objectives, including any prespecified hypotheses                                                                                                                     | 3                  |
| <b>Methods</b>            |        |                                                                                                                                                                                      |                    |
| Study design              | 4      | Present key elements of study design early in the paper                                                                                                                              | 4                  |
| Setting                   | 5      | Describe the setting, locations, and relevant dates, including periods of recruitment, exposure, follow-up, and data collection                                                      | 3                  |
| Participants              | 6      | (a) Give the eligibility criteria, and the sources and methods of selection of participants. Describe methods of follow-up                                                           | 4                  |
|                           |        | (b) For matched studies, give matching criteria and number of exposed and unexposed                                                                                                  |                    |
| Variables                 | 7      | Clearly define all outcomes, exposures, predictors, potential confounders, and effect modifiers. Give diagnostic criteria, if applicable                                             | 4                  |
| Data sources/measurement  | 8*     | For each variable of interest, give sources of data and details of methods of assessment (measurement). Describe comparability of assessment methods if there is more than one group | 4                  |
| Bias                      | 9      | Describe any efforts to address potential sources of bias                                                                                                                            | 5                  |
| Study size                | 10     | Explain how the study size was arrived at                                                                                                                                            | 3                  |
| Quantitative variables    | 11     | Explain how quantitative variables were handled in the analyses. If applicable, describe which groupings were chosen and why                                                         | 4-5                |
| Statistical methods       | 12     | (a) Describe all statistical methods, including those used to control for confounding                                                                                                | 4-5                |
|                           |        | (b) Describe any methods used to examine subgroups and interactions                                                                                                                  | 4-5                |
|                           |        | (c) Explain how missing data were addressed                                                                                                                                          | NA                 |
|                           |        | (d) If applicable, explain how loss to follow-up was addressed                                                                                                                       | NA                 |
|                           |        | (e) Describe any sensitivity analyses                                                                                                                                                | 5                  |
| <b>Results</b>            |        |                                                                                                                                                                                      |                    |

|                          |     |                                                                                                                                                                                                              |              |
|--------------------------|-----|--------------------------------------------------------------------------------------------------------------------------------------------------------------------------------------------------------------|--------------|
| Participants             | 13* | (a) Report numbers of individuals at each stage of study—eg numbers potentially eligible, examined for eligibility, confirmed eligible, included in the study, completing follow-up, and analysed            | 5            |
|                          |     | (b) Give reasons for non-participation at each stage                                                                                                                                                         | NA           |
|                          |     | (c) Consider use of a flow diagram                                                                                                                                                                           |              |
| Descriptive data         | 14* | (a) Give characteristics of study participants (eg demographic, clinical, social) and information on exposures and potential confounders                                                                     | 5-7 Table 1  |
|                          |     | (b) Indicate number of participants with missing data for each variable of interest                                                                                                                          | NA           |
|                          |     | (c) Summarise follow-up time (eg, average and total amount)                                                                                                                                                  | 7 Table 1    |
| Outcome data             | 15* | Report numbers of outcome events or summary measures over time                                                                                                                                               | 8-9 Table 2  |
| Main results             | 16  | (a) Give unadjusted estimates and, if applicable, confounder-adjusted estimates and their precision (eg, 95% confidence interval). Make clear which confounders were adjusted for and why they were included | Table 2      |
|                          |     | (b) Report category boundaries when continuous variables were categorized                                                                                                                                    | NA           |
|                          |     | (c) If relevant, consider translating estimates of relative risk into absolute risk for a meaningful time period                                                                                             | Not possible |
| Other analyses           | 17  | Report other analyses done—eg analyses of subgroups and interactions, and sensitivity analyses                                                                                                               | 8            |
| <b>Discussion</b>        |     |                                                                                                                                                                                                              |              |
| Key results              | 18  | Summarise key results with reference to study objectives                                                                                                                                                     | 10           |
| <b>Limitations</b>       |     |                                                                                                                                                                                                              | 11 and 2     |
| Interpretation           | 20  | Give a cautious overall interpretation of results considering objectives, limitations, multiplicity of analyses, results from similar studies, and other relevant evidence                                   | 11           |
| Generalisability         | 21  | Discuss the generalisability (external validity) of the study results                                                                                                                                        | 11           |
| <b>Other information</b> |     |                                                                                                                                                                                                              |              |
| Funding                  | 22  | Give the source of funding and the role of the funders for the present study and, if applicable, for the original study on which the present article is based                                                | 13           |

\*Give information separately for cases and controls in case-control studies and, if applicable, for exposed and unexposed groups in cohort and cross-sectional studies.

**Note:** An Explanation and Elaboration article discusses each checklist item and gives methodological background and published examples of transparent reporting. The STROBE checklist is best used in conjunction with this article (freely available on the Web sites of PLoS Medicine at <http://www.plosmedicine.org/>, Annals of Internal Medicine at <http://www.annals.org/>, and Epidemiology at <http://www.epidem.com/>). Information on the STROBE Initiative is available at [www.strobe-statement.org](http://www.strobe-statement.org).
